# Supplementary material
Source: MDPI journal article supplement (https://www.mdpi.com/search?q=molbank-2023-M1562)
Supplement: s002 [file molbank-2023-M1562-s002-mod.mol]

  corina  01222313523D 1   1.00000     0.00000 
CORINA 4.4.0 0026  12.08.2021
216224  0  0  0  0  0  0  0  0999 V2000
   -6.5406   -8.0395   -0.0329 C   0  0  0  0  0  0  0  0  0  0  0  0
   -6.6983   -9.1911   -0.7846 C   0  0  0  0  0  0  0  0  0  0  0  0
   -7.9696   -9.6236   -1.1170 C   0  0  0  0  0  0  0  0  0  0  0  0
   -9.0906   -8.8891   -0.7499 C   0  0  0  0  0  0  0  0  0  0  0  0
   -8.9291   -7.7116   -0.0446 C   0  0  0  0  0  0  0  0  0  0  0  0
   -7.6551   -7.3027    0.3373 C   0  0  0  0  0  0  0  0  0  0  0  0
   -5.5129   -9.9871   -1.2683 C   0  0  1  0  0  0  0  0  0  0  0  0
  -10.4337   -9.4176   -1.1763 C   0  0  2  0  0  0  0  0  0  0  0  0
  -10.8365   -8.7939   -2.4865 C   0  0  0  0  0  0  0  0  0  0  0  0
   -4.4927   -9.0779   -1.8913 C   0  0  0  0  0  0  0  0  0  0  0  0
   -3.2876   -8.7345   -1.3181 C   0  0  0  0  0  0  0  0  0  0  0  0
   -2.3838   -7.9394   -2.0214 C   0  0  0  0  0  0  0  0  0  0  0  0
   -2.7076   -7.4474   -3.2754 C   0  0  0  0  0  0  0  0  0  0  0  0
   -3.9461   -7.7372   -3.8280 C   0  0  0  0  0  0  0  0  0  0  0  0
   -4.8124   -8.5693   -3.1500 C   0  0  0  0  0  0  0  0  0  0  0  0
   -9.9534   -7.9395   -3.1272 C   0  0  0  0  0  0  0  0  0  0  0  0
  -10.2946   -7.3480   -4.3275 C   0  0  0  0  0  0  0  0  0  0  0  0
  -11.5361   -7.6029   -4.8938 C   0  0  0  0  0  0  0  0  0  0  0  0
  -12.4130   -8.4754   -4.2689 C   0  0  0  0  0  0  0  0  0  0  0  0
  -12.0573   -9.0852   -3.0740 C   0  0  0  0  0  0  0  0  0  0  0  0
   -4.3361   -7.1757   -5.1700 C   0  0  1  0  0  0  0  0  0  0  0  0
   -9.3205   -6.4371   -5.0303 C   0  0  1  0  0  0  0  0  0  0  0  0
   -5.7371   -7.6022   -5.5285 C   0  0  0  0  0  0  0  0  0  0  0  0
   -8.9646   -5.2862   -4.1331 C   0  0  0  0  0  0  0  0  0  0  0  0
   -8.1067   -7.2120   -5.4678 C   0  0  0  0  0  0  0  0  0  0  0  0
   -5.9235   -8.6563   -6.4115 C   0  0  0  0  0  0  0  0  0  0  0  0
   -7.2043   -8.9933   -6.8195 C   0  0  0  0  0  0  0  0  0  0  0  0
   -8.2884   -8.2652   -6.3632 C   0  0  0  0  0  0  0  0  0  0  0  0
   -6.8338   -6.9203   -5.0252 C   0  0  0  0  0  0  0  0  0  0  0  0
   -5.3090   -7.6039    0.3360 O   0  0  0  0  0  0  0  0  0  0  0  0
   -9.9739   -6.9110    0.2932 O   0  0  0  0  0  0  0  0  0  0  0  0
   -2.9179   -9.1050   -0.0619 O   0  0  0  0  0  0  0  0  0  0  0  0
   -1.7892   -6.7112   -3.9567 O   0  0  0  0  0  0  0  0  0  0  0  0
   -4.8576   -9.3618   -6.8720 O   0  0  0  0  0  0  0  0  0  0  0  0
   -9.5368   -8.5757   -6.7984 O   0  0  0  0  0  0  0  0  0  0  0  0
  -11.9009   -6.9993   -6.0543 O   0  0  0  0  0  0  0  0  0  0  0  0
  -13.2494   -7.1881   -6.4878 C   0  0  0  0  0  0  0  0  0  0  0  0
  -13.4756   -6.4299   -7.7704 C   0  0  0  0  0  0  0  0  0  0  0  0
  -14.6830   -6.4621   -8.3682 N   0  0  0  0  0  0  0  0  0  0  0  0
  -14.1477  -10.2126   -3.2001 C   0  0  0  0  0  0  0  0  0  0  0  0
  -14.9609  -11.2288   -2.4405 C   0  0  0  0  0  0  0  0  0  0  0  0
   -0.5418   -6.4651   -3.3044 C   0  0  0  0  0  0  0  0  0  0  0  0
   -1.4132   -9.1215    1.8048 C   0  0  0  0  0  0  0  0  0  0  0  0
   -0.2708   -8.7972    2.4422 N   0  0  0  0  0  0  0  0  0  0  0  0
    0.3415   -5.6401   -4.2044 C   0  0  0  0  0  0  0  0  0  0  0  0
   -1.5941   -8.7618    0.3526 C   0  0  0  0  0  0  0  0  0  0  0  0
  -10.9358   -4.9537    1.2894 C   0  0  0  0  0  0  0  0  0  0  0  0
  -10.8892   -3.7077    1.8012 N   0  0  0  0  0  0  0  0  0  0  0  0
   -5.2549   -6.4668    1.1998 C   0  0  0  0  0  0  0  0  0  0  0  0
   -3.8215   -6.0346    1.3721 C   0  0  0  0  0  0  0  0  0  0  0  0
   -3.5135   -5.0539    2.2438 N   0  0  0  0  0  0  0  0  0  0  0  0
   -9.6399   -9.5777   -7.8120 C   0  0  0  0  0  0  0  0  0  0  0  0
  -11.0925   -9.8912   -8.0625 C   0  0  0  0  0  0  0  0  0  0  0  0
  -11.4316  -10.8762   -8.9176 N   0  0  0  0  0  0  0  0  0  0  0  0
   -5.1309  -10.4325   -7.7781 C   0  0  0  0  0  0  0  0  0  0  0  0
   -3.8375  -11.0945   -8.1781 C   0  0  0  0  0  0  0  0  0  0  0  0
   -3.8501  -12.1369   -9.0324 N   0  0  0  0  0  0  0  0  0  0  0  0
   -9.6602   -5.6600    0.9085 C   0  0  0  0  0  0  0  0  0  0  0  0
  -12.9141   -9.9825   -2.5165 O   0  0  0  0  0  0  0  0  0  0  0  0
   -2.9451   -6.5693    0.7264 O   0  0  0  0  0  0  0  0  0  0  0  0
  -12.0043   -5.5064    1.1355 O   0  0  0  0  0  0  0  0  0  0  0  0
   -2.7854  -10.6893   -7.7312 O   0  0  0  0  0  0  0  0  0  0  0  0
  -11.9564   -9.2571   -7.4946 O   0  0  0  0  0  0  0  0  0  0  0  0
    1.5753   -5.2839   -3.7952 N   0  0  0  0  0  0  0  0  0  0  0  0
   -0.0577   -5.2967   -5.2969 O   0  0  0  0  0  0  0  0  0  0  0  0
   -2.2957   -9.7027    2.4000 O   0  0  0  0  0  0  0  0  0  0  0  0
  -12.5710   -5.7908   -8.2646 O   0  0  0  0  0  0  0  0  0  0  0  0
  -16.1706  -11.6043   -2.9010 N   0  0  0  0  0  0  0  0  0  0  0  0
  -14.5268  -11.7088   -1.4148 O   0  0  0  0  0  0  0  0  0  0  0  0
   -9.3567   -4.0033   -4.4677 C   0  0  0  0  0  0  0  0  0  0  0  0
   -9.0306   -2.9431   -3.6443 C   0  0  0  0  0  0  0  0  0  0  0  0
   -8.3090   -3.1666   -2.4807 C   0  0  0  0  0  0  0  0  0  0  0  0
   -7.9167   -4.4548   -2.1471 C   0  0  0  0  0  0  0  0  0  0  0  0
   -8.2502   -5.5123   -2.9710 C   0  0  0  0  0  0  0  0  0  0  0  0
   -7.9866   -2.1252   -1.6691 O   0  0  0  0  0  0  0  0  0  0  0  0
   -6.1786   -1.4670    1.5577 C   0  0  0  0  0  0  0  0  0  0  0  0
   -5.9117   -0.1786    2.3385 C   0  0  0  0  0  0  0  0  0  0  0  0
   -5.1148   -0.5045    3.6032 C   0  0  0  0  0  0  0  0  0  0  0  0
   -4.8479    0.7840    4.3840 C   0  0  0  0  0  0  0  0  0  0  0  0
   -4.0510    0.4581    5.6488 C   0  0  0  0  0  0  0  0  0  0  0  0
   -3.7841    1.7465    6.4295 C   0  0  0  0  0  0  0  0  0  0  0  0
   -2.9872    1.4206    7.6943 C   0  0  0  0  0  0  0  0  0  0  0  0
   -2.7203    2.7091    8.4751 C   0  0  0  0  0  0  0  0  0  0  0  0
   -1.9234    2.3832    9.7399 C   0  0  0  0  0  0  0  0  0  0  0  0
   -1.6565    3.6716   10.5206 C   0  0  0  0  0  0  0  0  0  0  0  0
   -6.9754   -1.1412    0.2929 C   0  0  0  0  0  0  0  0  0  0  0  0
   -7.2423   -2.4296   -0.4878 C   0  0  0  0  0  0  0  0  0  0  0  0
   -4.9765  -10.8559   -0.1763 C   0  0  0  0  0  0  0  0  0  0  0  0
   -5.0847  -10.4532    1.1420 C   0  0  0  0  0  0  0  0  0  0  0  0
   -4.5897  -11.2542    2.1529 C   0  0  0  0  0  0  0  0  0  0  0  0
   -3.9838  -12.4635    1.8444 C   0  0  0  0  0  0  0  0  0  0  0  0
   -3.8764  -12.8652    0.5209 C   0  0  0  0  0  0  0  0  0  0  0  0
   -4.3780  -12.0632   -0.4860 C   0  0  0  0  0  0  0  0  0  0  0  0
   -3.4957  -13.2530    2.8370 O   0  0  0  0  0  0  0  0  0  0  0  0
   -1.7454  -16.5489    3.2707 C   0  0  0  0  0  0  0  0  0  0  0  0
   -1.2602  -17.2956    4.5149 C   0  0  0  0  0  0  0  0  0  0  0  0
   -0.6060  -18.6137    4.0958 C   0  0  0  0  0  0  0  0  0  0  0  0
   -0.1208  -19.3604    5.3400 C   0  0  0  0  0  0  0  0  0  0  0  0
    0.5333  -20.6785    4.9209 C   0  0  0  0  0  0  0  0  0  0  0  0
    1.0186  -21.4253    6.1650 C   0  0  0  0  0  0  0  0  0  0  0  0
    1.6727  -22.7434    5.7460 C   0  0  0  0  0  0  0  0  0  0  0  0
    2.1579  -23.4901    6.9901 C   0  0  0  0  0  0  0  0  0  0  0  0
    2.8121  -24.8082    6.5711 C   0  0  0  0  0  0  0  0  0  0  0  0
    3.2973  -25.5549    7.8152 C   0  0  0  0  0  0  0  0  0  0  0  0
   -2.3995  -15.2308    3.6898 C   0  0  0  0  0  0  0  0  0  0  0  0
   -2.8848  -14.4841    2.4457 C   0  0  0  0  0  0  0  0  0  0  0  0
  -11.4738   -9.1990   -0.1195 C   0  0  0  0  0  0  0  0  0  0  0  0
  -11.7028  -10.1724    0.8353 C   0  0  0  0  0  0  0  0  0  0  0  0
  -12.6609   -9.9733    1.8104 C   0  0  0  0  0  0  0  0  0  0  0  0
  -13.3935   -8.7954    1.8311 C   0  0  0  0  0  0  0  0  0  0  0  0
  -13.1618   -7.8202    0.8719 C   0  0  0  0  0  0  0  0  0  0  0  0
  -12.1987   -8.0218   -0.0977 C   0  0  0  0  0  0  0  0  0  0  0  0
  -14.3369   -8.5973    2.7891 O   0  0  0  0  0  0  0  0  0  0  0  0
  -16.8301   -5.9963    3.8535 C   0  0  0  0  0  0  0  0  0  0  0  0
  -17.8413   -5.9550    5.0011 C   0  0  0  0  0  0  0  0  0  0  0  0
  -18.6076   -4.6314    4.9581 C   0  0  0  0  0  0  0  0  0  0  0  0
  -19.6188   -4.5901    6.1056 C   0  0  0  0  0  0  0  0  0  0  0  0
  -20.3851   -3.2666    6.0627 C   0  0  0  0  0  0  0  0  0  0  0  0
  -21.3962   -3.2252    7.2102 C   0  0  0  0  0  0  0  0  0  0  0  0
  -22.1626   -1.9017    7.1673 C   0  0  0  0  0  0  0  0  0  0  0  0
  -23.1737   -1.8604    8.3148 C   0  0  0  0  0  0  0  0  0  0  0  0
  -23.9401   -0.5368    8.2719 C   0  0  0  0  0  0  0  0  0  0  0  0
  -24.9512   -0.4955    9.4194 C   0  0  0  0  0  0  0  0  0  0  0  0
  -16.0638   -7.3198    3.8965 C   0  0  0  0  0  0  0  0  0  0  0  0
  -15.0527   -7.3612    2.7490 C   0  0  0  0  0  0  0  0  0  0  0  0
   -4.2540   -5.6701   -5.1595 C   0  0  0  0  0  0  0  0  0  0  0  0
   -3.9840   -4.9854   -6.3301 C   0  0  0  0  0  0  0  0  0  0  0  0
   -3.9083   -3.6061   -6.3231 C   0  0  0  0  0  0  0  0  0  0  0  0
   -4.1034   -2.9078   -5.1403 C   0  0  0  0  0  0  0  0  0  0  0  0
   -4.3742   -3.5971   -3.9672 C   0  0  0  0  0  0  0  0  0  0  0  0
   -4.4544   -4.9762   -3.9805 C   0  0  0  0  0  0  0  0  0  0  0  0
   -4.0290   -1.5509   -5.1307 O   0  0  0  0  0  0  0  0  0  0  0  0
   -4.3454    1.3141   -2.7210 C   0  0  0  0  0  0  0  0  0  0  0  0
   -4.2234    2.8278   -2.9070 C   0  0  0  0  0  0  0  0  0  0  0  0
   -4.4501    3.5265   -1.5649 C   0  0  0  0  0  0  0  0  0  0  0  0
   -4.3281    5.0402   -1.7509 C   0  0  0  0  0  0  0  0  0  0  0  0
   -4.5547    5.7389   -0.4087 C   0  0  0  0  0  0  0  0  0  0  0  0
   -4.4328    7.2526   -0.5947 C   0  0  0  0  0  0  0  0  0  0  0  0
   -4.6594    7.9513    0.7474 C   0  0  0  0  0  0  0  0  0  0  0  0
   -4.5374    9.4650    0.5614 C   0  0  0  0  0  0  0  0  0  0  0  0
   -4.7641   10.1637    1.9036 C   0  0  0  0  0  0  0  0  0  0  0  0
   -4.6421   11.6774    1.7176 C   0  0  0  0  0  0  0  0  0  0  0  0
   -4.1187    0.6154   -4.0632 C   0  0  0  0  0  0  0  0  0  0  0  0
   -4.2407   -0.8983   -3.8772 C   0  0  0  0  0  0  0  0  0  0  0  0
  -14.9029   -5.7250   -9.6151 C   0  0  0  0  0  0  0  0  0  0  0  0
  -16.3467   -5.9272  -10.0792 C   0  0  0  0  0  0  0  0  0  0  0  0
  -16.5672   -5.1881  -11.3294 N   0  3  0  0  0  0  0  0  0  0  0  0
  -17.9535   -5.3822  -11.7750 C   0  0  0  0  0  0  0  0  0  0  0  0
  -16.3216   -3.7577  -11.1025 C   0  0  0  0  0  0  0  0  0  0  0  0
   -2.1201   -4.6338    2.4114 C   0  0  0  0  0  0  0  0  0  0  0  0
   -2.0465   -3.5144    3.4517 C   0  0  0  0  0  0  0  0  0  0  0  0
   -0.6492   -3.0931    3.6197 N   0  3  0  0  0  0  0  0  0  0  0  0
  -12.1292   -3.0211    2.1716 C   0  0  0  0  0  0  0  0  0  0  0  0
   -0.0950   -9.1469    3.8539 C   0  0  0  0  0  0  0  0  0  0  0  0
    1.2781   -8.6691    4.3305 C   0  0  0  0  0  0  0  0  0  0  0  0
    1.4544   -9.0197    5.7461 N   0  3  0  0  0  0  0  0  0  0  0  0
    2.7727   -8.5609    6.2037 C   0  0  0  0  0  0  0  0  0  0  0  0
    0.4059   -8.3717    6.5453 C   0  0  0  0  0  0  0  0  0  0  0  0
   -0.5786   -2.0183    4.6187 C   0  0  0  0  0  0  0  0  0  0  0  0
   -0.1276   -2.6040    2.3365 C   0  0  0  0  0  0  0  0  0  0  0  0
  -11.7984   -1.6326    2.7225 C   0  0  0  0  0  0  0  0  0  0  0  0
  -13.0418   -0.9441    3.0938 N   0  3  0  0  0  0  0  0  0  0  0  0
  -16.9612  -12.5923   -2.1626 C   0  0  0  0  0  0  0  0  0  0  0  0
  -18.2820  -12.8386   -2.8945 C   0  0  0  0  0  0  0  0  0  0  0  0
  -19.0747  -13.8293   -2.1540 N   0  3  0  0  0  0  0  0  0  0  0  0
  -13.8995   -0.8092    1.9089 C   0  0  0  0  0  0  0  0  0  0  0  0
  -13.7451   -1.7237    4.1212 C   0  0  0  0  0  0  0  0  0  0  0  0
  -20.3429  -14.0658   -2.8567 C   0  0  0  0  0  0  0  0  0  0  0  0
  -18.3233  -15.0883   -2.0626 C   0  0  0  0  0  0  0  0  0  0  0  0
  -12.8437  -11.1809   -9.1611 C   0  0  0  0  0  0  0  0  0  0  0  0
  -12.9516  -12.3311  -10.1643 C   0  0  0  0  0  0  0  0  0  0  0  0
  -14.3675  -12.6367  -10.4085 N   0  3  0  0  0  0  0  0  0  0  0  0
  -14.4711  -13.7411  -11.3716 C   0  0  0  0  0  0  0  0  0  0  0  0
  -15.0092  -13.0264   -9.1458 C   0  0  0  0  0  0  0  0  0  0  0  0
   -2.5928  -12.7805   -9.4212 C   0  0  0  0  0  0  0  0  0  0  0  0
   -2.8853  -13.9268  -10.3913 C   0  0  0  0  0  0  0  0  0  0  0  0
   -1.6246  -14.5722  -10.7813 N   0  3  0  0  0  0  0  0  0  0  0  0
   -0.7524  -13.5876  -11.4355 C   0  0  0  0  0  0  0  0  0  0  0  0
   -0.9551  -15.1013   -9.5856 C   0  0  0  0  0  0  0  0  0  0  0  0
    2.4341   -4.4819   -4.6702 C   0  0  0  0  0  0  0  0  0  0  0  0
    3.7696   -4.2184   -3.9717 C   0  0  0  0  0  0  0  0  0  0  0  0
    4.6307   -3.4142   -4.8491 N   0  3  0  0  0  0  0  0  0  0  0  0
    5.9130   -3.1612   -4.1785 C   0  0  0  0  0  0  0  0  0  0  0  0
    4.8689   -4.1422   -6.1025 C   0  0  0  0  0  0  0  0  0  0  0  0
  -15.6471   -5.6854  -12.3610 C   0  0  0  0  0  0  0  0  0  0  0  0
  -18.1729   -4.6435  -13.0701 C   0  0  0  0  0  0  0  0  0  0  0  0
  -17.2753   -3.9710  -13.5480 O   0  0  0  0  0  0  0  0  0  0  0  0
  -19.2482   -4.7184  -13.6400 O   0  5  0  0  0  0  0  0  0  0  0  0
    3.9713   -2.1349   -5.1436 C   0  0  0  0  0  0  0  0  0  0  0  0
    6.8185   -2.3871   -5.1015 C   0  0  0  0  0  0  0  0  0  0  0  0
    6.4172   -2.0397   -6.1991 O   0  5  0  0  0  0  0  0  0  0  0  0
    7.9524   -2.1084   -4.7507 O   0  0  0  0  0  0  0  0  0  0  0  0
    0.1557   -4.2357    4.0721 C   0  0  0  0  0  0  0  0  0  0  0  0
    0.8464   -1.5450    4.7473 C   0  0  0  0  0  0  0  0  0  0  0  0
    1.7386   -2.1294    4.1565 O   0  0  0  0  0  0  0  0  0  0  0  0
    1.1070   -0.5776    5.4420 O   0  5  0  0  0  0  0  0  0  0  0  0
  -12.7241    0.3890    3.6228 C   0  0  0  0  0  0  0  0  0  0  0  0
  -13.9945    1.0719    4.0596 C   0  0  0  0  0  0  0  0  0  0  0  0
  -15.0741    0.5507    3.8376 O   0  0  0  0  0  0  0  0  0  0  0  0
  -13.9427    2.1456    4.6349 O   0  5  0  0  0  0  0  0  0  0  0  0
  -19.3506  -13.3244   -0.8024 C   0  0  0  0  0  0  0  0  0  0  0  0
  -21.1361  -15.1155   -2.1218 C   0  0  0  0  0  0  0  0  0  0  0  0
  -20.7432  -15.5349   -1.0466 O   0  5  0  0  0  0  0  0  0  0  0  0
  -22.1709  -15.5452   -2.6026 O   0  0  0  0  0  0  0  0  0  0  0  0
    1.3607  -10.4771    5.9049 C   0  0  0  0  0  0  0  0  0  0  0  0
    2.9865   -8.9914    7.6320 C   0  0  0  0  0  0  0  0  0  0  0  0
    2.0808   -9.5245    8.2501 O   0  5  0  0  0  0  0  0  0  0  0  0
    4.0651   -8.8066    8.1695 O   0  0  0  0  0  0  0  0  0  0  0  0
   -1.9055  -15.6728  -11.7127 C   0  0  0  0  0  0  0  0  0  0  0  0
   -0.6185  -16.3729  -12.0658 C   0  0  0  0  0  0  0  0  0  0  0  0
    0.4464  -15.9228  -11.6787 O   0  5  0  0  0  0  0  0  0  0  0  0
   -0.6422  -17.3894  -12.7386 O   0  0  0  0  0  0  0  0  0  0  0  0
  -15.0382  -11.4483  -10.9522 C   0  0  0  0  0  0  0  0  0  0  0  0
  -15.9224  -14.0849  -11.5875 C   0  0  0  0  0  0  0  0  0  0  0  0
  -16.7935  -13.3941  -11.0871 O   0  0  0  0  0  0  0  0  0  0  0  0
  -16.2254  -15.0538  -12.2626 O   0  5  0  0  0  0  0  0  0  0  0  0
  1  2  2  0      
  6  1  1  0      
  1 30  1  0      
  2  3  1  0      
  2  7  1  0      
  3  4  2  0      
  4  5  1  0      
  4  8  1  0      
  5  6  2  0      
  5 31  1  0      
  7 10  1  0      
  7 88  1  0      
  8  9  1  0      
107  8  1  0      
  9 16  2  0      
 20  9  1  0      
 10 11  2  0      
 15 10  1  0      
 11 12  1  0      
 11 32  1  0      
 12 13  2  0      
 13 14  1  0      
 13 33  1  0      
 14 15  2  0      
 14 21  1  0      
 16 17  1  0      
 17 18  2  0      
 17 22  1  0      
 18 19  1  0      
 18 36  1  0      
 19 20  2  0      
 20 59  1  0      
 21 23  1  0      
126 21  1  0      
 22 24  1  0      
 22 25  1  0      
 23 26  2  0      
 29 23  1  0      
 24 70  2  0      
 74 24  1  0      
 28 25  1  0      
 25 29  2  0      
 26 27  1  0      
 26 34  1  0      
 27 28  2  0      
 28 35  1  0      
 30 49  1  0      
 31 58  1  0      
 32 46  1  0      
 33 42  1  0      
 34 55  1  0      
 35 52  1  0      
 36 37  1  0      
 37 38  1  0      
 38 39  1  0      
 38 67  2  0      
 39145  1  0      
 40 41  1  0      
 59 40  1  0      
 41 68  1  0      
 41 69  2  0      
 42 45  1  0      
 43 44  1  0      
 46 43  1  0      
 43 66  2  0      
 44154  1  0      
 45 64  1  0      
 45 65  2  0      
 47 48  1  0      
 58 47  1  0      
 47 61  2  0      
 48153  1  0      
 49 50  1  0      
 51 50  1  0      
 50 60  2  0      
 51150  1  0      
 52 53  1  0      
 53 54  1  0      
 53 63  2  0      
 54170  1  0      
 55 56  1  0      
 56 57  1  0      
 56 62  2  0      
 57175  1  0      
 64180  1  0      
 68163  1  0      
 70 71  1  0      
 71 72  2  0      
 72 73  1  0      
 72 75  1  0      
 73 74  2  0      
 75 87  1  0      
 76 77  1  0      
 76 86  1  0      
 77 78  1  0      
 78 79  1  0      
 79 80  1  0      
 80 81  1  0      
 81 82  1  0      
 82 83  1  0      
 83 84  1  0      
 84 85  1  0      
 86 87  1  0      
 88 89  2  0      
 93 88  1  0      
 89 90  1  0      
 90 91  2  0      
 91 92  1  0      
 91 94  1  0      
 92 93  2  0      
 94106  1  0      
 95 96  1  0      
 95105  1  0      
 96 97  1  0      
 97 98  1  0      
 98 99  1  0      
 99100  1  0      
100101  1  0      
101102  1  0      
102103  1  0      
103104  1  0      
105106  1  0      
107108  2  0      
112107  1  0      
108109  1  0      
109110  2  0      
110111  1  0      
110113  1  0      
111112  2  0      
113125  1  0      
114115  1  0      
114124  1  0      
115116  1  0      
116117  1  0      
117118  1  0      
118119  1  0      
119120  1  0      
120121  1  0      
121122  1  0      
122123  1  0      
124125  1  0      
126127  2  0      
131126  1  0      
127128  1  0      
128129  2  0      
129130  1  0      
129132  1  0      
130131  2  0      
132144  1  0      
133134  1  0      
133143  1  0      
134135  1  0      
135136  1  0      
136137  1  0      
137138  1  0      
138139  1  0      
139140  1  0      
140141  1  0      
141142  1  0      
143144  1  0      
145146  1  0      
146147  1  0      
147148  1  0      
147149  1  0      
147185  1  0      
148186  1  0      
150151  1  0      
151152  1  0      
152159  1  0      
152160  1  0      
152193  1  0      
153161  1  0      
154155  1  0      
155156  1  0      
156157  1  0      
156158  1  0      
156205  1  0      
157206  1  0      
159194  1  0      
161162  1  0      
162166  1  0      
162167  1  0      
162197  1  0      
163164  1  0      
164165  1  0      
165168  1  0      
165169  1  0      
165201  1  0      
168202  1  0      
170171  1  0      
171172  1  0      
172173  1  0      
172174  1  0      
172213  1  0      
173214  1  0      
175176  1  0      
176177  1  0      
177178  1  0      
177179  1  0      
177209  1  0      
180181  1  0      
181182  1  0      
182183  1  0      
182184  1  0      
182189  1  0      
183190  1  0      
186187  2  0      
186188  1  0      
190191  1  0      
190192  2  0      
194195  2  0      
194196  1  0      
197198  1  0      
198199  2  0      
198200  1  0      
202203  1  0      
202204  2  0      
206207  1  0      
206208  2  0      
209210  1  0      
210211  1  0      
210212  2  0      
214215  2  0      
214216  1  0      
M  CHG  8 147   1 152   1 156   1 162   1 165   1 172   1 177   1 182   1
M  CHG  8 188  -1 191  -1 196  -1 200  -1 203  -1 207  -1 211  -1 216  -1
M  END
$$$$
