# Supplementary material
Source: MDPI journal article supplement (https://www.mdpi.com/search?q=molbank-2023-M1562)
Supplement: s002 [file molbank-2023-M1562-s002.inchi]

InChI=1/C164H248N16O36/c1-21-25-29-33-37-41-45-49-53-57-93-205-125-69-61-121(62-70-125)161-129-97-131(139(211-115-147(183)167-79-87-175(9,10)107-155(193)194)101-137(129)209-113-145(181)165-77-85-173(5,6)105-153(189)190)162(122-63-71-126(72-64-122)206-94-58-54-50-46-42-38-34-30-26-22-2)133-99-135(143(215-119-151(187)171-83-91-179(17,18)111-159(201)202)103-141(133)213-117-149(185)169-81-89-177(13,14)109-157(197)198)164(124-67-75-128(76-68-124)208-96-60-56-52-48-44-40-36-32-28-24-4)136-100-134(142(214-118-150(186)170-82-90-178(15,16)110-158(199)200)104-144(136)216-120-152(188)172-84-92-180(19,20)112-160(203)204)163(123-65-73-127(74-66-123)207-95-59-55-51-47-43-39-35-31-27-23-3)132-98-130(161)138(210-114-146(182)166-78-86-174(7,8)106-154(191)192)102-140(132)212-116-148(184)168-80-88-176(11,12)108-156(195)196/h61-76,97-104,161-164H,21-60,77-96,105-120H2,1-20H3,(H8-8,165,166,167,168,169,170,171,172,181,182,183,184,185,186,187,188,189,190,191,192,193,194,195,196,197,198,199,200,201,202,203,204)/t161-,162+,163-,164+
AuxInfo=1/2/N:85,142,123,104,174,213,149,185,178,179,169,201,184,189,166,167,158,205,160,193,84,141,122,103,83,140,121,102,82,139,120,101,81,138,119,100,80,137,118,99,79,136,117,98,78,135,116,97,77,134,115,96,76,133,114,95,86,143,124,105,70,74,127,131,108,112,89,93,71,73,128,130,109,111,90,92,170,145,175,163,180,153,154,150,171,146,176,164,181,161,155,151,87,144,125,106,29,16,15,3,27,19,12,6,173,148,209,168,183,197,157,159,52,37,55,40,42,58,46,49,24,126,107,88,72,129,110,91,25,17,23,9,14,4,10,2,28,18,26,20,13,5,11,1,53,38,56,41,45,47,43,50,214,186,210,202,190,198,206,194,22,21,8,7,54,39,57,68,64,48,44,51,172,147,177,165,182,162,156,152,63,67,62,69,65,61,66,60,215,216,187,188,211,212,203,204,191,192,199,200,207,208,195,196,75,132,113,94,35,36,34,59,33,31,32,30/E:(1,2,3,4)(5,6,7,8,9,10,11,12,13,14,15,16,17,18,19,20)(21,22,23,24)(25,26,27,28)(29,30,31,32)(33,34,35,36)(37,38,39,40)(41,42,43,44)(45,46,47,48)(49,50,51,52)(53,54,55,56)(57,58,59,60)(61,62,63,64,65,66,67,68)(69,70,71,72,73,74,75,76)(77,78,79,80,81,82,83,84)(85,86,87,88,89,90,91,92)(93,94,95,96)(97,98,99,100)(101,102,103,104)(105,106,107,108,109,110,111,112)(113,114,115,116,117,118,119,120)(121,122,123,124)(125,126,127,128)(129,130,131,132,133,134,135,136)(137,138,139,140,141,142,143,144)(145,146,147,148,149,150,151,152)(153,154,155,156,157,158,159,160)(161,162,163,164)(165,166,167,168,169,170,171,172)(173,174,175,176,177,178,179,180)(181,182,183,184,185,186,187,188)(189,190,191,192,193,194,195,196,197,198,199,200,201,202,203,204)(205,206,207,208)(209,210,211,212,213,214,215,216)/CRV:173+1,174+1,175+1,176+1,177+1,178+1,179+1,180+1,190-1,192-1,193-1,195-1,197-1,200-1,201-1,204-1/rA:216CCCCCCCCCCCCCCCCCCCCCCCCCCCCCOOOOOOOCCNCCCCNCCCNCCNCCNCCNCOOOOONOOONOCCCCCOCCCCCCCCCCCCCCCCCCOCCCCCCCCCCCCCCCCCCOCCCCCCCCCCCCCCCCCCOCCCCCCCCCCCCCCN+CCCCN+CCCN+CCCCCN+CCN+CCCCCCN+CCCCN+CCCCN+CCCCOO-CCO-OCCOO-CCOO-CCO-OCCO-OCCO-OCCOO-/rB:d1;s2;d3;s4;s1d5;s2;s4;s8;s7;d10;s11;d12;s13;s10d14;d9;s16;d17;s18;s9d19;s14;s17;s21;s22;s22;d23;s26;s25d27;s23d25;s1;s5;s11;s13;s26;s28;s18;s36;s37;s38;;s40;s33;;s43;s42;s32s43;;s47;s30;s49;s50;s35;s52;s53;s34;s55;s56;s31s47;s20s40;d50;d47;d56;d53;s45;d45;d43;d38;s41;d41;d24;s70;d71;s72;s24d73;s72;;s76;s77;s78;s79;s80;s81;s82;s83;s84;s76;s75s86;s7;d88;s89;d90;s91;s88d92;s91;;s95;s96;s97;s98;s99;s100;s101;s102;s103;s95;s94s105;s8;d107;s108;d109;s110;s107d111;s110;;s114;s115;s116;s117;s118;s119;s120;s121;s122;s114;s113s124;s21;d126;s127;d128;s129;s126d130;s129;;s133;s134;s135;s136;s137;s138;s139;s140;s141;s133;s132s143;s39;s145;s146;s147;s147;s51;s150;s151;s48;s44;s154;s155;s156;s156;s152;s152;s153;s161;s68;s163;s164;s162;s162;s165;s165;s54;s170;s171;s172;s172;s57;s175;s176;s177;s177;s64;s180;s181;s182;s182;s147;s148;d186;s186;s182;s183;s190;d190;s152;s159;d194;s194;s162;s197;d198;s198;s165;s168;s202;d202;s156;s157;s206;d206;s177;s209;s210;d210;s172;s173;d214;s214;/rC:-15.2639,-10.1649,-2.0838;-15.0411,-9.5495,-.8353;-16.1147,-9.4768,.0575;-17.3536,-10.0796,-.1797;-17.5975,-10.6913,-1.4201;-16.5508,-10.6558,-2.3497;-13.6562,-9.0832,-.4073;-18.4108,-10.0632,.9123;-18.8417,-8.6286,1.1689;-13.4198,-7.5879,-.2339;-12.638,-6.8632,-1.153;-12.4737,-5.4867,-.9494;-12.8359,-4.804,.219;-13.4765,-5.5819,1.2008;-13.8286,-6.9081,.9185;-18.4261,-7.9679,2.3291;-18.8407,-6.6758,2.6606;-19.6257,-5.96,1.7408;-19.8758,-6.5824,.512;-19.6431,-7.9364,.2426;-13.6669,-5.0387,2.6059;-18.4364,-6.0816,3.9951;-15.0534,-4.5579,3.0004;-18.3616,-7.1002,5.1083;-17.2855,-5.1113,3.8565;-15.2914,-3.2043,3.2995;-16.3213,-2.9617,4.2162;-17.3411,-3.8694,4.5078;-16.1114,-5.4584,3.1772;-14.3339,-10.1747,-3.0958;-18.8007,-11.3076,-1.6423;-12.1281,-7.4161,-2.301;-12.4968,-3.4966,.4823;-14.3895,-2.2025,3.0559;-18.2452,-3.6148,5.5041;-20.0001,-4.6505,1.9231;-21.3782,-4.5169,2.2338;-21.9393,-3.1271,1.9475;-23.2524,-3.1384,1.5559;-21.2124,-9.1241,-1.0518;-22.4276,-8.2205,-1.2287;-11.726,-2.7754,-.465;-10.1325,-8.2334,-3.4224;-8.8175,-7.8595,-3.5161;-12.547,-2.3478,-1.6812;-10.7946,-7.8597,-2.1101;-19.7292,-12.182,-3.659;-19.4654,-10.9728,-4.2371;-13.6197,-11.3889,-3.2247;-13.0624,-11.539,-4.6301;-12.7075,-10.3618,-5.2273;-19.377,-2.8637,5.1364;-19.1118,-1.3736,5.0476;-19.3766,-.8388,3.82;-14.8447,-1.387,1.9902;-14.2951,.0185,2.0996;-12.9358,.0992,2.0059;-18.8643,-12.4691,-2.447;-19.9612,-8.4603,-.9849;-12.9693,-12.6074,-5.1858;-20.6119,-12.9141,-4.0362;-14.9933,.9953,2.2329;-18.7827,-.6958,5.9923;-11.8914,-2.1119,-2.8603;-13.742,-2.1856,-1.6267;-10.7194,-8.8,-4.3136;-21.3027,-2.1091,2.0788;-23.5265,-8.8631,-1.733;-22.4455,-7.0494,-.9349;-17.1803,-7.4644,5.7615;-17.1899,-8.3973,6.8034;-18.3751,-9.01,7.2369;-19.5424,-8.6586,6.5484;-19.5414,-7.7376,5.5046;-18.4976,-9.8906,8.2765;-16.822,-11.5983,11.1514;-17.4494,-12.2883,12.3734;-16.4307,-13.0662,13.2187;-17.1116,-13.7181,14.4332;-16.1411,-14.57,15.2651;-16.8442,-15.2031,16.4768;-15.8975,-16.0951,17.295;-16.6079,-16.7277,18.5025;-15.6725,-17.6459,19.3042;-16.3893,-18.297,20.4943;-17.9185,-10.9647,10.284;-17.3866,-10.1934,9.0763;-13.0459,-9.9849,.6682;-11.9624,-10.8258,.3732;-11.4168,-11.7113,1.306;-11.9118,-11.8124,2.613;-12.9866,-10.9654,2.9091;-13.5346,-10.0829,1.9767;-11.4589,-12.6753,3.5789;-9.0817,-15.5223,4.2131;-8.8853,-16.438,5.4327;-7.7014,-17.4064,5.2731;-7.5602,-18.318,6.5037;-6.3301,-19.2376,6.4288;-6.2307,-20.1388,7.6713;-4.9703,-21.019,7.6673;-4.9015,-21.9114,8.9183;-3.6267,-22.7688,8.9549;-3.5742,-23.658,10.2047;-10.211,-14.5059,4.4542;-10.4662,-13.6096,3.2412;-18.0378,-10.8399,2.1669;-18.9169,-10.8953,3.2567;-18.5964,-11.5754,4.4351;-17.3676,-12.23,4.5981;-16.5425,-12.2536,3.4656;-16.8619,-11.5887,2.2814;-16.9718,-12.9281,5.7097;-18.1149,-14.7351,8.8058;-17.2964,-15.5349,9.8335;-18.1438,-16.1193,10.9754;-17.2732,-16.9481,11.935;-18.0628,-17.5394,13.1139;-17.1609,-18.4099,14.0053;-17.9125,-19.0085,15.2047;-16.9983,-19.9052,16.056;-17.7314,-20.5001,17.268;-16.809,-21.393,18.1085;-17.1975,-14.157,7.7158;-17.9262,-13.3194,6.6627;-13.0814,-5.9668,3.6694;-13.4761,-5.8902,5.0111;-12.8959,-6.6863,6.0015;-11.8832,-7.6132,5.7165;-11.4447,-7.6302,4.3859;-12.0124,-6.829,3.3938;-11.2281,-8.3842,6.6443;-10.4472,-8.5757,10.3197;-9.4851,-9.4531,11.1374;-9.5531,-9.1507,12.6438;-8.6181,-10.0671,13.4506;-8.703,-9.8062,14.9638;-7.7999,-10.7647,15.7582;-7.8965,-10.5369,17.2758;-7.0164,-11.5255,18.0591;-7.1156,-11.3143,19.5782;-6.2465,-12.3149,20.3519;-10.3881,-8.9059,8.8185;-11.3532,-8.0446,8.0016;-24.0412,-1.9207,1.3203;-24.5478,-1.3512,2.6571;-25.7713,-.4321,2.5623;-26.0419,.244,3.8911;-27.0066,-1.2113,2.1289;-12.2361,-10.3075,-6.6198;-13.3276,-10.7653,-7.61;-12.8439,-11.1179,-9.0241;-20.3349,-10.3911,-5.2639;-8.0314,-8.0905,-4.7329;-8.5235,-7.1626,-5.8589;-8.0779,-7.5578,-7.2706;-8.7037,-6.5196,-8.1803;-6.5614,-7.5161,-7.3557;-14.1009,-11.5114,-9.7737;-11.8471,-12.2669,-8.9709;-20.5796,-11.286,-6.4959;-22.0301,-11.2911,-6.9889;-24.7943,-8.1722,-2.0043;-24.9944,-8.0518,-3.5249;-26.1258,-7.1174,-3.9575;-22.076,-12.2331,-8.193;-22.9718,-11.8906,-5.9524;-27.4116,-7.5983,-3.3221;-25.7887,-5.6891,-3.5499;-19.5366,.6068,3.6356;-20.9142,.9805,4.215;-21.3978,2.3998,3.9202;-22.7437,2.5235,4.6078;-20.4197,3.4166,4.4841;-12.256,1.3997,2.055;-12.617,2.2685,.829;-12.7619,3.7693,1.1166;-13.9205,4.0242,2.0694;-11.47,4.2822,1.7328;-10.4439,-2.1984,-3.1;-9.7436,-.8748,-2.74;-8.2327,-.8388,-3.0202;-7.7691,.5369,-2.5902;-7.9728,-1.0642,-4.5024;-25.5186,.6415,1.5154;-25.8029,-.7481,4.9953;-26.6829,-1.6171,5.1522;-24.68,-.7247,5.5409;-7.5455,-1.9425,-2.2279;-6.2699,.5424,-2.5444;-5.7628,.2649,-1.4397;-5.6884,.6828,-3.637;-12.1768,-9.9079,-9.6512;-13.7402,-12.0288,-11.1348;-13.5292,-13.2551,-11.2168;-13.6339,-11.1749,-12.0356;-22.46,-9.9291,-7.4982;-23.0112,-9.0867,-6.383;-24.1821,-9.3281,-6.0313;-22.2764,-8.2396,-5.8407;-26.2265,-7.1562,-5.4761;-28.5365,-6.6802,-3.7077;-28.6724,-5.6578,-3.006;-29.1916,-6.9876,-4.7226;-8.5552,-8.9677,-7.5914;-8.7146,-7.0555,-9.5784;-7.6323,-6.9809,-10.1904;-9.7602,-7.6465,-9.9153;-13.0284,4.4074,-.2315;-13.1342,5.8941,-.0623;-12.0601,6.5238,-.1205;-14.2685,6.3399,.198;-21.4986,2.5864,2.4116;-23.5657,3.5643,3.9044;-23.2276,4.7475,4.1003;-24.4091,3.1537,3.0812;
