# Supplementary material
Source: MDPI journal article supplement (https://www.mdpi.com/search?q=molbank-2023-M1562)
Supplement: s002 [file molbank-2023-M1562-s002.mol]

  Chem3D  11222213503D

216224  0  0  0  0  0  0  0  0999 V2000
  -15.2639  -10.1649   -2.0838 C   0  0  0  0  0  0  0  0  0  0  0  0
  -15.0411   -9.5495   -0.8353 C   0  0  0  0  0  0  0  0  0  0  0  0
  -16.1147   -9.4768    0.0575 C   0  0  0  0  0  0  0  0  0  0  0  0
  -17.3536  -10.0796   -0.1797 C   0  0  0  0  0  0  0  0  0  0  0  0
  -17.5975  -10.6913   -1.4201 C   0  0  0  0  0  0  0  0  0  0  0  0
  -16.5508  -10.6558   -2.3497 C   0  0  0  0  0  0  0  0  0  0  0  0
  -13.6562   -9.0832   -0.4073 C   0  0  1  0  0  0  0  0  0  0  0  0
  -18.4108  -10.0632    0.9123 C   0  0  2  0  0  0  0  0  0  0  0  0
  -18.8417   -8.6286    1.1689 C   0  0  0  0  0  0  0  0  0  0  0  0
  -13.4198   -7.5879   -0.2339 C   0  0  0  0  0  0  0  0  0  0  0  0
  -12.6380   -6.8632   -1.1530 C   0  0  0  0  0  0  0  0  0  0  0  0
  -12.4737   -5.4867   -0.9494 C   0  0  0  0  0  0  0  0  0  0  0  0
  -12.8359   -4.8040    0.2190 C   0  0  0  0  0  0  0  0  0  0  0  0
  -13.4765   -5.5819    1.2008 C   0  0  0  0  0  0  0  0  0  0  0  0
  -13.8286   -6.9081    0.9185 C   0  0  0  0  0  0  0  0  0  0  0  0
  -18.4261   -7.9679    2.3291 C   0  0  0  0  0  0  0  0  0  0  0  0
  -18.8407   -6.6758    2.6606 C   0  0  0  0  0  0  0  0  0  0  0  0
  -19.6257   -5.9600    1.7408 C   0  0  0  0  0  0  0  0  0  0  0  0
  -19.8758   -6.5824    0.5120 C   0  0  0  0  0  0  0  0  0  0  0  0
  -19.6431   -7.9364    0.2426 C   0  0  0  0  0  0  0  0  0  0  0  0
  -13.6669   -5.0387    2.6059 C   0  0  1  0  0  0  0  0  0  0  0  0
  -18.4364   -6.0816    3.9951 C   0  0  1  0  0  0  0  0  0  0  0  0
  -15.0534   -4.5579    3.0004 C   0  0  0  0  0  0  0  0  0  0  0  0
  -18.3616   -7.1002    5.1083 C   0  0  0  0  0  0  0  0  0  0  0  0
  -17.2855   -5.1113    3.8565 C   0  0  0  0  0  0  0  0  0  0  0  0
  -15.2914   -3.2043    3.2995 C   0  0  0  0  0  0  0  0  0  0  0  0
  -16.3213   -2.9617    4.2162 C   0  0  0  0  0  0  0  0  0  0  0  0
  -17.3411   -3.8694    4.5078 C   0  0  0  0  0  0  0  0  0  0  0  0
  -16.1114   -5.4584    3.1772 C   0  0  0  0  0  0  0  0  0  0  0  0
  -14.3339  -10.1747   -3.0958 O   0  0  0  0  0  0  0  0  0  0  0  0
  -18.8007  -11.3076   -1.6423 O   0  0  0  0  0  0  0  0  0  0  0  0
  -12.1281   -7.4161   -2.3010 O   0  0  0  0  0  0  0  0  0  0  0  0
  -12.4968   -3.4966    0.4823 O   0  0  0  0  0  0  0  0  0  0  0  0
  -14.3895   -2.2025    3.0559 O   0  0  0  0  0  0  0  0  0  0  0  0
  -18.2452   -3.6148    5.5041 O   0  0  0  0  0  0  0  0  0  0  0  0
  -20.0001   -4.6505    1.9231 O   0  0  0  0  0  0  0  0  0  0  0  0
  -21.3782   -4.5169    2.2338 C   0  0  0  0  0  0  0  0  0  0  0  0
  -21.9393   -3.1271    1.9475 C   0  0  0  0  0  0  0  0  0  0  0  0
  -23.2524   -3.1384    1.5559 N   0  0  0  0  0  0  0  0  0  0  0  0
  -21.2124   -9.1241   -1.0518 C   0  0  0  0  0  0  0  0  0  0  0  0
  -22.4276   -8.2205   -1.2287 C   0  0  0  0  0  0  0  0  0  0  0  0
  -11.7260   -2.7754   -0.4650 C   0  0  0  0  0  0  0  0  0  0  0  0
  -10.1325   -8.2334   -3.4224 C   0  0  0  0  0  0  0  0  0  0  0  0
   -8.8175   -7.8595   -3.5161 N   0  0  0  0  0  0  0  0  0  0  0  0
  -12.5470   -2.3478   -1.6812 C   0  0  0  0  0  0  0  0  0  0  0  0
  -10.7946   -7.8597   -2.1101 C   0  0  0  0  0  0  0  0  0  0  0  0
  -19.7292  -12.1820   -3.6590 C   0  0  0  0  0  0  0  0  0  0  0  0
  -19.4654  -10.9728   -4.2371 N   0  0  0  0  0  0  0  0  0  0  0  0
  -13.6197  -11.3889   -3.2247 C   0  0  0  0  0  0  0  0  0  0  0  0
  -13.0624  -11.5390   -4.6301 C   0  0  0  0  0  0  0  0  0  0  0  0
  -12.7075  -10.3618   -5.2273 N   0  0  0  0  0  0  0  0  0  0  0  0
  -19.3770   -2.8637    5.1364 C   0  0  0  0  0  0  0  0  0  0  0  0
  -19.1118   -1.3736    5.0476 C   0  0  0  0  0  0  0  0  0  0  0  0
  -19.3766   -0.8388    3.8200 N   0  0  0  0  0  0  0  0  0  0  0  0
  -14.8447   -1.3870    1.9902 C   0  0  0  0  0  0  0  0  0  0  0  0
  -14.2951    0.0185    2.0996 C   0  0  0  0  0  0  0  0  0  0  0  0
  -12.9358    0.0992    2.0059 N   0  0  0  0  0  0  0  0  0  0  0  0
  -18.8643  -12.4691   -2.4470 C   0  0  0  0  0  0  0  0  0  0  0  0
  -19.9612   -8.4603   -0.9849 O   0  0  0  0  0  0  0  0  0  0  0  0
  -12.9693  -12.6074   -5.1858 O   0  0  0  0  0  0  0  0  0  0  0  0
  -20.6119  -12.9141   -4.0362 O   0  0  0  0  0  0  0  0  0  0  0  0
  -14.9933    0.9953    2.2329 O   0  0  0  0  0  0  0  0  0  0  0  0
  -18.7827   -0.6958    5.9923 O   0  0  0  0  0  0  0  0  0  0  0  0
  -11.8914   -2.1119   -2.8603 N   0  0  0  0  0  0  0  0  0  0  0  0
  -13.7420   -2.1856   -1.6267 O   0  0  0  0  0  0  0  0  0  0  0  0
  -10.7194   -8.8000   -4.3136 O   0  0  0  0  0  0  0  0  0  0  0  0
  -21.3027   -2.1091    2.0788 O   0  0  0  0  0  0  0  0  0  0  0  0
  -23.5265   -8.8631   -1.7330 N   0  0  0  0  0  0  0  0  0  0  0  0
  -22.4455   -7.0494   -0.9349 O   0  0  0  0  0  0  0  0  0  0  0  0
  -17.1803   -7.4644    5.7615 C   0  0  0  0  0  0  0  0  0  0  0  0
  -17.1899   -8.3973    6.8034 C   0  0  0  0  0  0  0  0  0  0  0  0
  -18.3751   -9.0100    7.2369 C   0  0  0  0  0  0  0  0  0  0  0  0
  -19.5424   -8.6586    6.5484 C   0  0  0  0  0  0  0  0  0  0  0  0
  -19.5414   -7.7376    5.5046 C   0  0  0  0  0  0  0  0  0  0  0  0
  -18.4976   -9.8906    8.2765 O   0  0  0  0  0  0  0  0  0  0  0  0
  -16.8220  -11.5983   11.1514 C   0  0  0  0  0  0  0  0  0  0  0  0
  -17.4494  -12.2883   12.3734 C   0  0  0  0  0  0  0  0  0  0  0  0
  -16.4307  -13.0662   13.2187 C   0  0  0  0  0  0  0  0  0  0  0  0
  -17.1116  -13.7181   14.4332 C   0  0  0  0  0  0  0  0  0  0  0  0
  -16.1411  -14.5700   15.2651 C   0  0  0  0  0  0  0  0  0  0  0  0
  -16.8442  -15.2031   16.4768 C   0  0  0  0  0  0  0  0  0  0  0  0
  -15.8975  -16.0951   17.2950 C   0  0  0  0  0  0  0  0  0  0  0  0
  -16.6079  -16.7277   18.5025 C   0  0  0  0  0  0  0  0  0  0  0  0
  -15.6725  -17.6459   19.3042 C   0  0  0  0  0  0  0  0  0  0  0  0
  -16.3893  -18.2970   20.4943 C   0  0  0  0  0  0  0  0  0  0  0  0
  -17.9185  -10.9647   10.2840 C   0  0  0  0  0  0  0  0  0  0  0  0
  -17.3866  -10.1934    9.0763 C   0  0  0  0  0  0  0  0  0  0  0  0
  -13.0459   -9.9849    0.6682 C   0  0  0  0  0  0  0  0  0  0  0  0
  -11.9624  -10.8258    0.3732 C   0  0  0  0  0  0  0  0  0  0  0  0
  -11.4168  -11.7113    1.3060 C   0  0  0  0  0  0  0  0  0  0  0  0
  -11.9118  -11.8124    2.6130 C   0  0  0  0  0  0  0  0  0  0  0  0
  -12.9866  -10.9654    2.9091 C   0  0  0  0  0  0  0  0  0  0  0  0
  -13.5346  -10.0829    1.9767 C   0  0  0  0  0  0  0  0  0  0  0  0
  -11.4589  -12.6753    3.5789 O   0  0  0  0  0  0  0  0  0  0  0  0
   -9.0817  -15.5223    4.2131 C   0  0  0  0  0  0  0  0  0  0  0  0
   -8.8853  -16.4380    5.4327 C   0  0  0  0  0  0  0  0  0  0  0  0
   -7.7014  -17.4064    5.2731 C   0  0  0  0  0  0  0  0  0  0  0  0
   -7.5602  -18.3180    6.5037 C   0  0  0  0  0  0  0  0  0  0  0  0
   -6.3301  -19.2376    6.4288 C   0  0  0  0  0  0  0  0  0  0  0  0
   -6.2307  -20.1388    7.6713 C   0  0  0  0  0  0  0  0  0  0  0  0
   -4.9703  -21.0190    7.6673 C   0  0  0  0  0  0  0  0  0  0  0  0
   -4.9015  -21.9114    8.9183 C   0  0  0  0  0  0  0  0  0  0  0  0
   -3.6267  -22.7688    8.9549 C   0  0  0  0  0  0  0  0  0  0  0  0
   -3.5742  -23.6580   10.2047 C   0  0  0  0  0  0  0  0  0  0  0  0
  -10.2110  -14.5059    4.4542 C   0  0  0  0  0  0  0  0  0  0  0  0
  -10.4662  -13.6096    3.2412 C   0  0  0  0  0  0  0  0  0  0  0  0
  -18.0378  -10.8399    2.1669 C   0  0  0  0  0  0  0  0  0  0  0  0
  -18.9169  -10.8953    3.2567 C   0  0  0  0  0  0  0  0  0  0  0  0
  -18.5964  -11.5754    4.4351 C   0  0  0  0  0  0  0  0  0  0  0  0
  -17.3676  -12.2300    4.5981 C   0  0  0  0  0  0  0  0  0  0  0  0
  -16.5425  -12.2536    3.4656 C   0  0  0  0  0  0  0  0  0  0  0  0
  -16.8619  -11.5887    2.2814 C   0  0  0  0  0  0  0  0  0  0  0  0
  -16.9718  -12.9281    5.7097 O   0  0  0  0  0  0  0  0  0  0  0  0
  -18.1149  -14.7351    8.8058 C   0  0  0  0  0  0  0  0  0  0  0  0
  -17.2964  -15.5349    9.8335 C   0  0  0  0  0  0  0  0  0  0  0  0
  -18.1438  -16.1193   10.9754 C   0  0  0  0  0  0  0  0  0  0  0  0
  -17.2732  -16.9481   11.9350 C   0  0  0  0  0  0  0  0  0  0  0  0
  -18.0628  -17.5394   13.1139 C   0  0  0  0  0  0  0  0  0  0  0  0
  -17.1609  -18.4099   14.0053 C   0  0  0  0  0  0  0  0  0  0  0  0
  -17.9125  -19.0085   15.2047 C   0  0  0  0  0  0  0  0  0  0  0  0
  -16.9983  -19.9052   16.0560 C   0  0  0  0  0  0  0  0  0  0  0  0
  -17.7314  -20.5001   17.2680 C   0  0  0  0  0  0  0  0  0  0  0  0
  -16.8090  -21.3930   18.1085 C   0  0  0  0  0  0  0  0  0  0  0  0
  -17.1975  -14.1570    7.7158 C   0  0  0  0  0  0  0  0  0  0  0  0
  -17.9262  -13.3194    6.6627 C   0  0  0  0  0  0  0  0  0  0  0  0
  -13.0814   -5.9668    3.6694 C   0  0  0  0  0  0  0  0  0  0  0  0
  -13.4761   -5.8902    5.0111 C   0  0  0  0  0  0  0  0  0  0  0  0
  -12.8959   -6.6863    6.0015 C   0  0  0  0  0  0  0  0  0  0  0  0
  -11.8832   -7.6132    5.7165 C   0  0  0  0  0  0  0  0  0  0  0  0
  -11.4447   -7.6302    4.3859 C   0  0  0  0  0  0  0  0  0  0  0  0
  -12.0124   -6.8290    3.3938 C   0  0  0  0  0  0  0  0  0  0  0  0
  -11.2281   -8.3842    6.6443 O   0  0  0  0  0  0  0  0  0  0  0  0
  -10.4472   -8.5757   10.3197 C   0  0  0  0  0  0  0  0  0  0  0  0
   -9.4851   -9.4531   11.1374 C   0  0  0  0  0  0  0  0  0  0  0  0
   -9.5531   -9.1507   12.6438 C   0  0  0  0  0  0  0  0  0  0  0  0
   -8.6181  -10.0671   13.4506 C   0  0  0  0  0  0  0  0  0  0  0  0
   -8.7030   -9.8062   14.9638 C   0  0  0  0  0  0  0  0  0  0  0  0
   -7.7999  -10.7647   15.7582 C   0  0  0  0  0  0  0  0  0  0  0  0
   -7.8965  -10.5369   17.2758 C   0  0  0  0  0  0  0  0  0  0  0  0
   -7.0164  -11.5255   18.0591 C   0  0  0  0  0  0  0  0  0  0  0  0
   -7.1156  -11.3143   19.5782 C   0  0  0  0  0  0  0  0  0  0  0  0
   -6.2465  -12.3149   20.3519 C   0  0  0  0  0  0  0  0  0  0  0  0
  -10.3881   -8.9059    8.8185 C   0  0  0  0  0  0  0  0  0  0  0  0
  -11.3532   -8.0446    8.0016 C   0  0  0  0  0  0  0  0  0  0  0  0
  -24.0412   -1.9207    1.3203 C   0  0  0  0  0  0  0  0  0  0  0  0
  -24.5478   -1.3512    2.6571 C   0  0  0  0  0  0  0  0  0  0  0  0
  -25.7713   -0.4321    2.5623 N   0  3  0  0  0  0  0  0  0  0  0  0
  -26.0419    0.2440    3.8911 C   0  0  0  0  0  0  0  0  0  0  0  0
  -27.0066   -1.2113    2.1289 C   0  0  0  0  0  0  0  0  0  0  0  0
  -12.2361  -10.3075   -6.6198 C   0  0  0  0  0  0  0  0  0  0  0  0
  -13.3276  -10.7653   -7.6100 C   0  0  0  0  0  0  0  0  0  0  0  0
  -12.8439  -11.1179   -9.0241 N   0  3  0  0  0  0  0  0  0  0  0  0
  -20.3349  -10.3911   -5.2639 C   0  0  0  0  0  0  0  0  0  0  0  0
   -8.0314   -8.0905   -4.7329 C   0  0  0  0  0  0  0  0  0  0  0  0
   -8.5235   -7.1626   -5.8589 C   0  0  0  0  0  0  0  0  0  0  0  0
   -8.0779   -7.5578   -7.2706 N   0  3  0  0  0  0  0  0  0  0  0  0
   -8.7037   -6.5196   -8.1803 C   0  0  0  0  0  0  0  0  0  0  0  0
   -6.5614   -7.5161   -7.3557 C   0  0  0  0  0  0  0  0  0  0  0  0
  -14.1009  -11.5114   -9.7737 C   0  0  0  0  0  0  0  0  0  0  0  0
  -11.8471  -12.2669   -8.9709 C   0  0  0  0  0  0  0  0  0  0  0  0
  -20.5796  -11.2860   -6.4959 C   0  0  0  0  0  0  0  0  0  0  0  0
  -22.0301  -11.2911   -6.9889 N   0  3  0  0  0  0  0  0  0  0  0  0
  -24.7943   -8.1722   -2.0043 C   0  0  0  0  0  0  0  0  0  0  0  0
  -24.9944   -8.0518   -3.5249 C   0  0  0  0  0  0  0  0  0  0  0  0
  -26.1258   -7.1174   -3.9575 N   0  3  0  0  0  0  0  0  0  0  0  0
  -22.0760  -12.2331   -8.1930 C   0  0  0  0  0  0  0  0  0  0  0  0
  -22.9718  -11.8906   -5.9524 C   0  0  0  0  0  0  0  0  0  0  0  0
  -27.4116   -7.5983   -3.3221 C   0  0  0  0  0  0  0  0  0  0  0  0
  -25.7887   -5.6891   -3.5499 C   0  0  0  0  0  0  0  0  0  0  0  0
  -19.5366    0.6068    3.6356 C   0  0  0  0  0  0  0  0  0  0  0  0
  -20.9142    0.9805    4.2150 C   0  0  0  0  0  0  0  0  0  0  0  0
  -21.3978    2.3998    3.9202 N   0  3  0  0  0  0  0  0  0  0  0  0
  -22.7437    2.5235    4.6078 C   0  0  0  0  0  0  0  0  0  0  0  0
  -20.4197    3.4166    4.4841 C   0  0  0  0  0  0  0  0  0  0  0  0
  -12.2560    1.3997    2.0550 C   0  0  0  0  0  0  0  0  0  0  0  0
  -12.6170    2.2685    0.8290 C   0  0  0  0  0  0  0  0  0  0  0  0
  -12.7619    3.7693    1.1166 N   0  3  0  0  0  0  0  0  0  0  0  0
  -13.9205    4.0242    2.0694 C   0  0  0  0  0  0  0  0  0  0  0  0
  -11.4700    4.2822    1.7328 C   0  0  0  0  0  0  0  0  0  0  0  0
  -10.4439   -2.1984   -3.1000 C   0  0  0  0  0  0  0  0  0  0  0  0
   -9.7436   -0.8748   -2.7400 C   0  0  0  0  0  0  0  0  0  0  0  0
   -8.2327   -0.8388   -3.0202 N   0  3  0  0  0  0  0  0  0  0  0  0
   -7.7691    0.5369   -2.5902 C   0  0  0  0  0  0  0  0  0  0  0  0
   -7.9728   -1.0642   -4.5024 C   0  0  0  0  0  0  0  0  0  0  0  0
  -25.5186    0.6415    1.5154 C   0  0  0  0  0  0  0  0  0  0  0  0
  -25.8029   -0.7481    4.9953 C   0  0  0  0  0  0  0  0  0  0  0  0
  -26.6829   -1.6171    5.1522 O   0  0  0  0  0  0  0  0  0  0  0  0
  -24.6800   -0.7247    5.5409 O   0  5  0  0  0  0  0  0  0  0  0  0
   -7.5455   -1.9425   -2.2279 C   0  0  0  0  0  0  0  0  0  0  0  0
   -6.2699    0.5424   -2.5444 C   0  0  0  0  0  0  0  0  0  0  0  0
   -5.7628    0.2649   -1.4397 O   0  5  0  0  0  0  0  0  0  0  0  0
   -5.6884    0.6828   -3.6370 O   0  0  0  0  0  0  0  0  0  0  0  0
  -12.1768   -9.9079   -9.6512 C   0  0  0  0  0  0  0  0  0  0  0  0
  -13.7402  -12.0288  -11.1348 C   0  0  0  0  0  0  0  0  0  0  0  0
  -13.5292  -13.2551  -11.2168 O   0  0  0  0  0  0  0  0  0  0  0  0
  -13.6339  -11.1749  -12.0356 O   0  5  0  0  0  0  0  0  0  0  0  0
  -22.4600   -9.9291   -7.4982 C   0  0  0  0  0  0  0  0  0  0  0  0
  -23.0112   -9.0867   -6.3830 C   0  0  0  0  0  0  0  0  0  0  0  0
  -24.1821   -9.3281   -6.0313 O   0  0  0  0  0  0  0  0  0  0  0  0
  -22.2764   -8.2396   -5.8407 O   0  5  0  0  0  0  0  0  0  0  0  0
  -26.2265   -7.1562   -5.4761 C   0  0  0  0  0  0  0  0  0  0  0  0
  -28.5365   -6.6802   -3.7077 C   0  0  0  0  0  0  0  0  0  0  0  0
  -28.6724   -5.6578   -3.0060 O   0  5  0  0  0  0  0  0  0  0  0  0
  -29.1916   -6.9876   -4.7226 O   0  0  0  0  0  0  0  0  0  0  0  0
   -8.5552   -8.9677   -7.5914 C   0  0  0  0  0  0  0  0  0  0  0  0
   -8.7146   -7.0555   -9.5784 C   0  0  0  0  0  0  0  0  0  0  0  0
   -7.6323   -6.9809  -10.1904 O   0  5  0  0  0  0  0  0  0  0  0  0
   -9.7602   -7.6465   -9.9153 O   0  0  0  0  0  0  0  0  0  0  0  0
  -13.0284    4.4074   -0.2315 C   0  0  0  0  0  0  0  0  0  0  0  0
  -13.1342    5.8941   -0.0623 C   0  0  0  0  0  0  0  0  0  0  0  0
  -12.0601    6.5238   -0.1205 O   0  5  0  0  0  0  0  0  0  0  0  0
  -14.2685    6.3399    0.1980 O   0  0  0  0  0  0  0  0  0  0  0  0
  -21.4986    2.5864    2.4116 C   0  0  0  0  0  0  0  0  0  0  0  0
  -23.5657    3.5643    3.9044 C   0  0  0  0  0  0  0  0  0  0  0  0
  -23.2276    4.7475    4.1003 O   0  0  0  0  0  0  0  0  0  0  0  0
  -24.4091    3.1537    3.0812 O   0  5  0  0  0  0  0  0  0  0  0  0
  1  2  2  0      
  6  1  1  0      
  1 30  1  0      
  2  3  1  0      
  2  7  1  0      
  3  4  2  0      
  4  5  1  0      
  4  8  1  0      
  5  6  2  0      
  5 31  1  0      
  7 10  1  0      
  7 88  1  0      
  8  9  1  0      
107  8  1  0      
  9 16  2  0      
 20  9  1  0      
 10 11  2  0      
 15 10  1  0      
 11 12  1  0      
 11 32  1  0      
 12 13  2  0      
 13 14  1  0      
 13 33  1  0      
 14 15  2  0      
 14 21  1  0      
 16 17  1  0      
 17 18  2  0      
 17 22  1  0      
 18 19  1  0      
 18 36  1  0      
 19 20  2  0      
 20 59  1  0      
 21 23  1  0      
126 21  1  0      
 22 24  1  0      
 22 25  1  0      
 23 26  2  0      
 29 23  1  0      
 24 70  2  0      
 74 24  1  0      
 28 25  1  0      
 25 29  2  0      
 26 27  1  0      
 26 34  1  0      
 27 28  2  0      
 28 35  1  0      
 30 49  1  0      
 31 58  1  0      
 32 46  1  0      
 33 42  1  0      
 34 55  1  0      
 35 52  1  0      
 36 37  1  0      
 37 38  1  0      
 38 39  1  0      
 38 67  2  0      
 39145  1  0      
 40 41  1  0      
 59 40  1  0      
 41 68  1  0      
 41 69  2  0      
 42 45  1  0      
 43 44  1  0      
 46 43  1  0      
 43 66  2  0      
 44154  1  0      
 45 64  1  0      
 45 65  2  0      
 47 48  1  0      
 58 47  1  0      
 47 61  2  0      
 48153  1  0      
 49 50  1  0      
 51 50  1  0      
 50 60  2  0      
 51150  1  0      
 52 53  1  0      
 53 54  1  0      
 53 63  2  0      
 54170  1  0      
 55 56  1  0      
 56 57  1  0      
 56 62  2  0      
 57175  1  0      
 64180  1  0      
 68163  1  0      
 70 71  1  0      
 71 72  2  0      
 72 73  1  0      
 72 75  1  0      
 73 74  2  0      
 75 87  1  0      
 76 77  1  0      
 76 86  1  0      
 77 78  1  0      
 78 79  1  0      
 79 80  1  0      
 80 81  1  0      
 81 82  1  0      
 82 83  1  0      
 83 84  1  0      
 84 85  1  0      
 86 87  1  0      
 88 89  2  0      
 93 88  1  0      
 89 90  1  0      
 90 91  2  0      
 91 92  1  0      
 91 94  1  0      
 92 93  2  0      
 94106  1  0      
 95 96  1  0      
 95105  1  0      
 96 97  1  0      
 97 98  1  0      
 98 99  1  0      
 99100  1  0      
100101  1  0      
101102  1  0      
102103  1  0      
103104  1  0      
105106  1  0      
107108  2  0      
112107  1  0      
108109  1  0      
109110  2  0      
110111  1  0      
110113  1  0      
111112  2  0      
113125  1  0      
114115  1  0      
114124  1  0      
115116  1  0      
116117  1  0      
117118  1  0      
118119  1  0      
119120  1  0      
120121  1  0      
121122  1  0      
122123  1  0      
124125  1  0      
126127  2  0      
131126  1  0      
127128  1  0      
128129  2  0      
129130  1  0      
129132  1  0      
130131  2  0      
132144  1  0      
133134  1  0      
133143  1  0      
134135  1  0      
135136  1  0      
136137  1  0      
137138  1  0      
138139  1  0      
139140  1  0      
140141  1  0      
141142  1  0      
143144  1  0      
145146  1  0      
146147  1  0      
147148  1  0      
147149  1  0      
147185  1  0      
148186  1  0      
150151  1  0      
151152  1  0      
152159  1  0      
152160  1  0      
152193  1  0      
153161  1  0      
154155  1  0      
155156  1  0      
156157  1  0      
156158  1  0      
156205  1  0      
157206  1  0      
159194  1  0      
161162  1  0      
162166  1  0      
162167  1  0      
162197  1  0      
163164  1  0      
164165  1  0      
165168  1  0      
165169  1  0      
165201  1  0      
168202  1  0      
170171  1  0      
171172  1  0      
172173  1  0      
172174  1  0      
172213  1  0      
173214  1  0      
175176  1  0      
176177  1  0      
177178  1  0      
177179  1  0      
177209  1  0      
180181  1  0      
181182  1  0      
182183  1  0      
182184  1  0      
182189  1  0      
183190  1  0      
186187  2  0      
186188  1  0      
190191  1  0      
190192  2  0      
194195  2  0      
194196  1  0      
197198  1  0      
198199  2  0      
198200  1  0      
202203  1  0      
202204  2  0      
206207  1  0      
206208  2  0      
209210  1  0      
210211  1  0      
210212  2  0      
214215  2  0      
214216  1  0      
M  CHG  8 147   1 152   1 156   1 162   1 165   1 172   1 177   1 182   1
M  CHG  8 188  -1 191  -1 196  -1 200  -1 203  -1 207  -1 211  -1 216  -1
M  END
