# Supplementary material
Source: MDPI journal article supplement (https://www.mdpi.com/search?q=molbank-2023-M1562)
Supplement: s003 [file molbank-2023-M1562-s003-mod.mol]

  corina  01222313523D 1   1.00000     0.00000 
CORINA 4.4.0 0026  12.08.2021
232240  0  0  0  0  0  0  0  0999 V2000
   -6.5790   -8.0283   -0.0811 C   0  0  0  0  0  0  0  0  0  0  0  0
   -6.7346   -9.1802   -0.8328 C   0  0  0  0  0  0  0  0  0  0  0  0
   -8.0049   -9.6111   -1.1715 C   0  0  0  0  0  0  0  0  0  0  0  0
   -9.1267   -8.8746   -0.8105 C   0  0  0  0  0  0  0  0  0  0  0  0
   -8.9670   -7.6969   -0.1052 C   0  0  0  0  0  0  0  0  0  0  0  0
   -7.6944   -7.2896    0.2829 C   0  0  0  0  0  0  0  0  0  0  0  0
   -5.5480   -9.9782   -1.3100 C   0  0  1  0  0  0  0  0  0  0  0  0
  -10.4684   -9.4014   -1.2434 C   0  0  2  0  0  0  0  0  0  0  0  0
  -10.8635   -8.7780   -2.5561 C   0  0  0  0  0  0  0  0  0  0  0  0
   -4.5232   -9.0710   -1.9284 C   0  0  0  0  0  0  0  0  0  0  0  0
   -3.3206   -8.7290   -1.3494 C   0  0  0  0  0  0  0  0  0  0  0  0
   -2.4120   -7.9357   -2.0485 C   0  0  0  0  0  0  0  0  0  0  0  0
   -2.7288   -7.4440   -3.3044 C   0  0  0  0  0  0  0  0  0  0  0  0
   -3.9648   -7.7323   -3.8632 C   0  0  0  0  0  0  0  0  0  0  0  0
   -4.8358   -8.5627   -3.1891 C   0  0  0  0  0  0  0  0  0  0  0  0
   -9.9760   -7.9253   -3.1928 C   0  0  0  0  0  0  0  0  0  0  0  0
  -10.3101   -7.3341   -4.3952 C   0  0  0  0  0  0  0  0  0  0  0  0
  -11.5491   -7.5875   -4.9676 C   0  0  0  0  0  0  0  0  0  0  0  0
  -12.4305   -8.4584   -4.3466 C   0  0  0  0  0  0  0  0  0  0  0  0
  -12.0818   -9.0679   -3.1496 C   0  0  0  0  0  0  0  0  0  0  0  0
   -4.3472   -7.1711   -5.2075 C   0  0  1  0  0  0  0  0  0  0  0  0
   -9.3312   -6.4251   -5.0936 C   0  0  1  0  0  0  0  0  0  0  0  0
   -5.7470   -7.5958   -5.5729 C   0  0  0  0  0  0  0  0  0  0  0  0
   -8.9781   -5.2741   -4.1953 C   0  0  0  0  0  0  0  0  0  0  0  0
   -8.1163   -7.2020   -5.5245 C   0  0  0  0  0  0  0  0  0  0  0  0
   -5.9304   -8.6502   -6.4561 C   0  0  0  0  0  0  0  0  0  0  0  0
   -7.2097   -8.9856   -6.8703 C   0  0  0  0  0  0  0  0  0  0  0  0
   -8.2950   -8.2555   -6.4200 C   0  0  0  0  0  0  0  0  0  0  0  0
   -6.8452   -6.9119   -5.0755 C   0  0  0  0  0  0  0  0  0  0  0  0
   -5.3487   -7.5943    0.2938 O   0  0  0  0  0  0  0  0  0  0  0  0
  -10.0123   -6.8946    0.2268 O   0  0  0  0  0  0  0  0  0  0  0  0
   -2.9578   -9.0992   -0.0910 O   0  0  0  0  0  0  0  0  0  0  0  0
   -1.8058   -6.7096   -3.9816 O   0  0  0  0  0  0  0  0  0  0  0  0
   -4.8633   -9.3576   -6.9107 O   0  0  0  0  0  0  0  0  0  0  0  0
   -9.5416   -8.5645   -6.8614 O   0  0  0  0  0  0  0  0  0  0  0  0
  -11.9071   -6.9842   -6.1304 O   0  0  0  0  0  0  0  0  0  0  0  0
  -13.2536   -7.1714   -6.5706 C   0  0  0  0  0  0  0  0  0  0  0  0
  -13.4722   -6.4136   -7.8548 C   0  0  0  0  0  0  0  0  0  0  0  0
  -14.6767   -6.4445   -8.4588 N   0  0  0  0  0  0  0  0  0  0  0  0
  -14.1732  -10.1922   -3.2855 C   0  0  0  0  0  0  0  0  0  0  0  0
  -14.9917  -11.2068   -2.5295 C   0  0  0  0  0  0  0  0  0  0  0  0
   -0.5614   -6.4649   -3.3230 C   0  0  0  0  0  0  0  0  0  0  0  0
   -1.4626   -9.1168    1.7833 C   0  0  0  0  0  0  0  0  0  0  0  0
   -0.3229   -8.7940    2.4261 N   0  0  0  0  0  0  0  0  0  0  0  0
    0.3277   -5.6418   -4.2191 C   0  0  0  0  0  0  0  0  0  0  0  0
   -1.6355   -8.7579    0.3299 C   0  0  0  0  0  0  0  0  0  0  0  0
  -10.9764   -4.9350    1.2166 C   0  0  0  0  0  0  0  0  0  0  0  0
  -10.9305   -3.6888    1.7278 N   0  0  0  0  0  0  0  0  0  0  0  0
   -5.2973   -6.4567    1.1571 C   0  0  0  0  0  0  0  0  0  0  0  0
   -3.8642   -6.0264    1.3363 C   0  0  0  0  0  0  0  0  0  0  0  0
   -3.5592   -5.0457    2.2091 N   0  0  0  0  0  0  0  0  0  0  0  0
   -9.6411   -9.5670   -7.8748 C   0  0  0  0  0  0  0  0  0  0  0  0
  -11.0928   -9.8785   -8.1326 C   0  0  0  0  0  0  0  0  0  0  0  0
  -11.4290  -10.8636   -8.9888 N   0  0  0  0  0  0  0  0  0  0  0  0
   -5.1335  -10.4285   -7.8175 C   0  0  0  0  0  0  0  0  0  0  0  0
   -3.8391  -11.0926   -8.2105 C   0  0  0  0  0  0  0  0  0  0  0  0
   -3.8489  -12.1355   -9.0642 N   0  0  0  0  0  0  0  0  0  0  0  0
   -9.6999   -5.6436    0.8428 C   0  0  0  0  0  0  0  0  0  0  0  0
  -12.9427   -9.9635   -2.5959 O   0  0  0  0  0  0  0  0  0  0  0  0
   -2.9854   -6.5626    0.6952 O   0  0  0  0  0  0  0  0  0  0  0  0
  -12.0449   -5.4863    1.0575 O   0  0  0  0  0  0  0  0  0  0  0  0
   -2.7887  -10.6887   -7.7586 O   0  0  0  0  0  0  0  0  0  0  0  0
  -11.9587   -9.2427   -7.5695 O   0  0  0  0  0  0  0  0  0  0  0  0
    1.5599   -5.2871   -3.8039 N   0  0  0  0  0  0  0  0  0  0  0  0
   -0.0655   -5.2985   -5.3138 O   0  0  0  0  0  0  0  0  0  0  0  0
   -2.3491   -9.6960    2.3745 O   0  0  0  0  0  0  0  0  0  0  0  0
  -12.5643   -5.7761   -8.3448 O   0  0  0  0  0  0  0  0  0  0  0  0
  -16.1996  -11.5808   -2.9959 N   0  0  0  0  0  0  0  0  0  0  0  0
  -14.5636  -11.6867   -1.5012 O   0  0  0  0  0  0  0  0  0  0  0  0
   -9.3668   -3.9909   -4.5327 C   0  0  0  0  0  0  0  0  0  0  0  0
   -9.0433   -2.9307   -3.7083 C   0  0  0  0  0  0  0  0  0  0  0  0
   -8.3278   -3.1544   -2.5410 C   0  0  0  0  0  0  0  0  0  0  0  0
   -7.9389   -4.4429   -2.2047 C   0  0  0  0  0  0  0  0  0  0  0  0
   -8.2698   -5.5005   -3.0296 C   0  0  0  0  0  0  0  0  0  0  0  0
   -8.0080   -2.1130   -1.7285 O   0  0  0  0  0  0  0  0  0  0  0  0
   -6.2151   -1.4553    1.5069 C   0  0  0  0  0  0  0  0  0  0  0  0
   -5.9503   -0.1668    2.2882 C   0  0  0  0  0  0  0  0  0  0  0  0
   -5.1601   -0.4930    3.5571 C   0  0  0  0  0  0  0  0  0  0  0  0
   -4.8953    0.7956    4.3384 C   0  0  0  0  0  0  0  0  0  0  0  0
   -4.1052    0.4694    5.6073 C   0  0  0  0  0  0  0  0  0  0  0  0
   -3.8404    1.7579    6.3886 C   0  0  0  0  0  0  0  0  0  0  0  0
   -3.0502    1.4317    7.6575 C   0  0  0  0  0  0  0  0  0  0  0  0
   -2.7854    2.7203    8.4388 C   0  0  0  0  0  0  0  0  0  0  0  0
   -1.9952    2.3941    9.7077 C   0  0  0  0  0  0  0  0  0  0  0  0
   -1.7304    3.6826   10.4890 C   0  0  0  0  0  0  0  0  0  0  0  0
   -7.0052   -1.1291    0.2379 C   0  0  0  0  0  0  0  0  0  0  0  0
   -7.2700   -2.4177   -0.5433 C   0  0  0  0  0  0  0  0  0  0  0  0
   -5.0184  -10.8471   -0.2148 C   0  0  0  0  0  0  0  0  0  0  0  0
   -5.1327  -10.4434    1.1027 C   0  0  0  0  0  0  0  0  0  0  0  0
   -4.6441  -11.2445    2.1166 C   0  0  0  0  0  0  0  0  0  0  0  0
   -4.0383  -12.4548    1.8120 C   0  0  0  0  0  0  0  0  0  0  0  0
   -3.9249  -12.8576    0.4893 C   0  0  0  0  0  0  0  0  0  0  0  0
   -4.4202  -12.0555   -0.5206 C   0  0  0  0  0  0  0  0  0  0  0  0
   -3.5565  -13.2444    2.8076 O   0  0  0  0  0  0  0  0  0  0  0  0
   -1.8133  -16.5426    3.2523 C   0  0  0  0  0  0  0  0  0  0  0  0
   -1.3355  -17.2893    4.4994 C   0  0  0  0  0  0  0  0  0  0  0  0
   -0.6812  -18.6086    4.0845 C   0  0  0  0  0  0  0  0  0  0  0  0
   -0.2034  -19.3552    5.3316 C   0  0  0  0  0  0  0  0  0  0  0  0
    0.4509  -20.6746    4.9167 C   0  0  0  0  0  0  0  0  0  0  0  0
    0.9287  -21.4212    6.1638 C   0  0  0  0  0  0  0  0  0  0  0  0
    1.5829  -22.7405    5.7489 C   0  0  0  0  0  0  0  0  0  0  0  0
    2.0607  -23.4872    6.9960 C   0  0  0  0  0  0  0  0  0  0  0  0
    2.7150  -24.8065    6.5811 C   0  0  0  0  0  0  0  0  0  0  0  0
    3.1928  -25.5531    7.8282 C   0  0  0  0  0  0  0  0  0  0  0  0
   -2.4676  -15.2233    3.6672 C   0  0  0  0  0  0  0  0  0  0  0  0
   -2.9454  -14.4767    2.4201 C   0  0  0  0  0  0  0  0  0  0  0  0
  -11.5135   -9.1806   -0.1921 C   0  0  0  0  0  0  0  0  0  0  0  0
  -11.7484  -10.1528    0.7625 C   0  0  0  0  0  0  0  0  0  0  0  0
  -12.7111   -9.9517    1.7326 C   0  0  0  0  0  0  0  0  0  0  0  0
  -13.4425   -8.7729    1.7485 C   0  0  0  0  0  0  0  0  0  0  0  0
  -13.2049   -7.7989    0.7896 C   0  0  0  0  0  0  0  0  0  0  0  0
  -12.2371   -8.0025   -0.1750 C   0  0  0  0  0  0  0  0  0  0  0  0
  -14.3904   -8.5728    2.7015 O   0  0  0  0  0  0  0  0  0  0  0  0
  -16.8860   -5.9679    3.7510 C   0  0  0  0  0  0  0  0  0  0  0  0
  -17.9028   -5.9243    4.8934 C   0  0  0  0  0  0  0  0  0  0  0  0
  -18.6674   -4.5999    4.8453 C   0  0  0  0  0  0  0  0  0  0  0  0
  -19.6842   -4.5563    5.9877 C   0  0  0  0  0  0  0  0  0  0  0  0
  -20.4488   -3.2320    5.9396 C   0  0  0  0  0  0  0  0  0  0  0  0
  -21.4657   -3.1884    7.0820 C   0  0  0  0  0  0  0  0  0  0  0  0
  -22.2303   -1.8640    7.0340 C   0  0  0  0  0  0  0  0  0  0  0  0
  -23.2471   -1.8204    8.1763 C   0  0  0  0  0  0  0  0  0  0  0  0
  -24.0117   -0.4960    8.1283 C   0  0  0  0  0  0  0  0  0  0  0  0
  -25.0285   -0.4524    9.2707 C   0  0  0  0  0  0  0  0  0  0  0  0
  -16.1214   -7.2923    3.7990 C   0  0  0  0  0  0  0  0  0  0  0  0
  -15.1046   -7.3359    2.6566 C   0  0  0  0  0  0  0  0  0  0  0  0
   -4.2629   -5.6656   -5.1976 C   0  0  0  0  0  0  0  0  0  0  0  0
   -3.9857   -4.9822   -6.3671 C   0  0  0  0  0  0  0  0  0  0  0  0
   -3.9080   -3.6029   -6.3606 C   0  0  0  0  0  0  0  0  0  0  0  0
   -4.1083   -2.9036   -5.1793 C   0  0  0  0  0  0  0  0  0  0  0  0
   -4.3863   -3.5917   -4.0072 C   0  0  0  0  0  0  0  0  0  0  0  0
   -4.4686   -4.9706   -4.0201 C   0  0  0  0  0  0  0  0  0  0  0  0
   -4.0320   -1.5467   -5.1703 O   0  0  0  0  0  0  0  0  0  0  0  0
   -4.3569    1.3203   -2.7642 C   0  0  0  0  0  0  0  0  0  0  0  0
   -4.2317    2.8337   -2.9505 C   0  0  0  0  0  0  0  0  0  0  0  0
   -4.4644    3.5336   -1.6100 C   0  0  0  0  0  0  0  0  0  0  0  0
   -4.3392    5.0470   -1.7964 C   0  0  0  0  0  0  0  0  0  0  0  0
   -4.5719    5.7469   -0.4559 C   0  0  0  0  0  0  0  0  0  0  0  0
   -4.4467    7.2604   -0.6423 C   0  0  0  0  0  0  0  0  0  0  0  0
   -4.6794    7.9602    0.6982 C   0  0  0  0  0  0  0  0  0  0  0  0
   -4.5542    9.4737    0.5119 C   0  0  0  0  0  0  0  0  0  0  0  0
   -4.7870   10.1736    1.8524 C   0  0  0  0  0  0  0  0  0  0  0  0
   -4.6617   11.6870    1.6660 C   0  0  0  0  0  0  0  0  0  0  0  0
   -4.1241    0.6204   -4.1047 C   0  0  0  0  0  0  0  0  0  0  0  0
   -4.2493   -0.8931   -3.9183 C   0  0  0  0  0  0  0  0  0  0  0  0
  -14.8891   -5.7078   -9.7072 C   0  0  0  0  0  0  0  0  0  0  0  0
  -16.3309   -5.9083  -10.1786 C   0  0  0  0  0  0  0  0  0  0  0  0
  -16.5439   -5.1696  -11.4303 N   0  3  0  0  0  0  0  0  0  0  0  0
  -17.9281   -5.3621  -11.8829 C   0  0  0  0  0  0  0  0  0  0  0  0
  -16.2974   -3.7394  -11.2030 C   0  0  0  0  0  0  0  0  0  0  0  0
   -2.1660   -4.6275    2.3833 C   0  0  0  0  0  0  0  0  0  0  0  0
   -2.0960   -3.5076    3.4235 C   0  0  0  0  0  0  0  0  0  0  0  0
   -0.6990   -3.0882    3.5982 N   0  3  0  0  0  0  0  0  0  0  0  0
  -12.1714   -3.0001    2.0912 C   0  0  0  0  0  0  0  0  0  0  0  0
   -0.1548   -9.1428    3.8390 C   0  0  0  0  0  0  0  0  0  0  0  0
    1.2167   -8.6670    4.3221 C   0  0  0  0  0  0  0  0  0  0  0  0
    1.3852   -9.0168    5.7389 N   0  3  0  0  0  0  0  0  0  0  0  0
    2.7021   -8.5599    6.2028 C   0  0  0  0  0  0  0  0  0  0  0  0
    0.3339   -8.3663    6.5323 C   0  0  0  0  0  0  0  0  0  0  0  0
   -0.6318   -2.0130    4.5969 C   0  0  0  0  0  0  0  0  0  0  0  0
   -0.1704   -2.6005    2.3173 C   0  0  0  0  0  0  0  0  0  0  0  0
  -11.8413   -1.6117    2.6429 C   0  0  0  0  0  0  0  0  0  0  0  0
  -13.0855   -0.9210    3.0073 N   0  3  0  0  0  0  0  0  0  0  0  0
  -16.9954  -12.5671   -2.2609 C   0  0  0  0  0  0  0  0  0  0  0  0
  -18.3128  -12.8120   -2.9993 C   0  0  0  0  0  0  0  0  0  0  0  0
  -19.1107  -13.8010   -2.2622 N   0  3  0  0  0  0  0  0  0  0  0  0
  -13.9368   -0.7856    1.8178 C   0  0  0  0  0  0  0  0  0  0  0  0
  -13.7954   -1.6988    4.0315 C   0  0  0  0  0  0  0  0  0  0  0  0
  -20.3757  -14.0362   -2.9712 C   0  0  0  0  0  0  0  0  0  0  0  0
  -18.3617  -15.0610   -2.1661 C   0  0  0  0  0  0  0  0  0  0  0  0
  -12.8403  -11.1663   -9.2393 C   0  0  0  0  0  0  0  0  0  0  0  0
  -12.9448  -12.3170  -10.2423 C   0  0  0  0  0  0  0  0  0  0  0  0
  -14.3599  -12.6206  -10.4935 N   0  3  0  0  0  0  0  0  0  0  0  0
  -14.4603  -13.7254  -11.4565 C   0  0  0  0  0  0  0  0  0  0  0  0
  -15.0086  -13.0086   -9.2339 C   0  0  0  0  0  0  0  0  0  0  0  0
   -2.5906  -12.7812   -9.4462 C   0  0  0  0  0  0  0  0  0  0  0  0
   -2.8799  -13.9278  -10.4170 C   0  0  0  0  0  0  0  0  0  0  0  0
   -1.6181  -14.5752  -10.8001 N   0  3  0  0  0  0  0  0  0  0  0  0
   -0.7412  -13.5924  -11.4505 C   0  0  0  0  0  0  0  0  0  0  0  0
   -0.9555  -15.1046   -9.6007 C   0  0  0  0  0  0  0  0  0  0  0  0
    2.4243   -4.4870   -4.6750 C   0  0  0  0  0  0  0  0  0  0  0  0
    3.7567   -4.2250   -3.9699 C   0  0  0  0  0  0  0  0  0  0  0  0
    4.6234   -3.4226   -4.8434 N   0  3  0  0  0  0  0  0  0  0  0  0
    5.9026   -3.1710   -4.1665 C   0  0  0  0  0  0  0  0  0  0  0  0
    4.8669   -4.1518   -6.0952 C   0  0  0  0  0  0  0  0  0  0  0  0
  -15.6192   -5.6688  -12.4569 C   0  0  0  0  0  0  0  0  0  0  0  0
  -18.1402   -4.6231  -13.1791 C   0  0  0  0  0  0  0  0  0  0  0  0
  -17.2476   -3.9572  -13.6479 O   0  0  0  0  0  0  0  0  0  0  0  0
  -19.3207   -4.7045  -13.8127 O   0  0  0  0  0  0  0  0  0  0  0  0
    3.9674   -2.1426   -5.1421 C   0  0  0  0  0  0  0  0  0  0  0  0
    6.8141   -2.3994   -5.0856 C   0  0  0  0  0  0  0  0  0  0  0  0
    8.0611   -2.0944   -4.6933 O   0  0  0  0  0  0  0  0  0  0  0  0
    6.4225   -2.0553   -6.1756 O   0  0  0  0  0  0  0  0  0  0  0  0
    0.1021   -4.2317    4.0550 C   0  0  0  0  0  0  0  0  0  0  0  0
    0.7932   -1.5419    4.7327 C   0  0  0  0  0  0  0  0  0  0  0  0
    1.6794   -2.1228    4.1522 O   0  0  0  0  0  0  0  0  0  0  0  0
    1.0779   -0.4770    5.4987 O   0  0  0  0  0  0  0  0  0  0  0  0
  -12.7686    0.4120    3.5370 C   0  0  0  0  0  0  0  0  0  0  0  0
  -14.0402    1.0974    3.9661 C   0  0  0  0  0  0  0  0  0  0  0  0
  -15.1098    0.5825    3.7407 O   0  0  0  0  0  0  0  0  0  0  0  0
  -13.9847    2.2799    4.5988 O   0  0  0  0  0  0  0  0  0  0  0  0
  -19.3928  -13.2948   -0.9123 C   0  0  0  0  0  0  0  0  0  0  0  0
  -21.1745  -15.0836   -2.2393 C   0  0  0  0  0  0  0  0  0  0  0  0
  -22.3119  -15.5553   -2.7739 O   0  0  0  0  0  0  0  0  0  0  0  0
  -20.7913  -15.4989   -1.1714 O   0  0  0  0  0  0  0  0  0  0  0  0
    1.2883  -10.4739    5.8984 C   0  0  0  0  0  0  0  0  0  0  0  0
    2.9080   -8.9898    7.6324 C   0  0  0  0  0  0  0  0  0  0  0  0
    4.0928   -8.7877    8.2300 O   0  0  0  0  0  0  0  0  0  0  0  0
    2.0065   -9.5163    8.2408 O   0  0  0  0  0  0  0  0  0  0  0  0
   -1.8959  -15.6761  -11.7323 C   0  0  0  0  0  0  0  0  0  0  0  0
   -0.6082  -16.3779  -12.0788 C   0  0  0  0  0  0  0  0  0  0  0  0
   -0.6321  -17.4974  -12.8191 O   0  0  0  0  0  0  0  0  0  0  0  0
    0.4459  -15.9330  -11.6903 O   0  0  0  0  0  0  0  0  0  0  0  0
  -15.0261  -11.4315  -11.0414 C   0  0  0  0  0  0  0  0  0  0  0  0
  -15.9110  -14.0667  -11.6801 C   0  0  0  0  0  0  0  0  0  0  0  0
  -16.7757  -13.3803  -11.1892 O   0  0  0  0  0  0  0  0  0  0  0  0
  -16.2425  -15.1333  -12.4246 O   0  0  0  0  0  0  0  0  0  0  0  0
  -23.0294  -16.5629   -2.0134 C   0  0  0  0  0  0  0  0  0  0  0  0
  -24.2900  -16.9756   -2.7760 C   0  0  0  0  0  0  0  0  0  0  0  0
  -15.2489    2.8820    4.9829 C   0  0  0  0  0  0  0  0  0  0  0  0
  -14.9861    4.2150    5.6865 C   0  0  0  0  0  0  0  0  0  0  0  0
    2.4719   -0.0797    5.5832 C   0  0  0  0  0  0  0  0  0  0  0  0
    2.5993    1.1431    6.4940 C   0  0  0  0  0  0  0  0  0  0  0  0
    4.2194   -9.2270    9.6082 C   0  0  0  0  0  0  0  0  0  0  0  0
    5.6288   -8.9152   10.1154 C   0  0  0  0  0  0  0  0  0  0  0  0
    8.8831   -1.3494   -5.6301 C   0  0  0  0  0  0  0  0  0  0  0  0
   10.2597   -1.0969   -5.0118 C   0  0  0  0  0  0  0  0  0  0  0  0
    0.6461  -18.1199  -13.1143 C   0  0  0  0  0  0  0  0  0  0  0  0
    0.4192  -19.3736  -13.9614 C   0  0  0  0  0  0  0  0  0  0  0  0
  -17.6589  -15.4020  -12.5975 C   0  0  0  0  0  0  0  0  0  0  0  0
  -17.8392  -16.6468  -13.4686 C   0  0  0  0  0  0  0  0  0  0  0  0
  -19.4537   -3.9666  -15.0561 C   0  0  0  0  0  0  0  0  0  0  0  0
  -20.8569   -4.1793  -15.6277 C   0  0  0  0  0  0  0  0  0  0  0  0
  1  2  2  0      
  6  1  1  0      
  1 30  1  0      
  2  3  1  0      
  2  7  1  0      
  3  4  2  0      
  4  5  1  0      
  4  8  1  0      
  5  6  2  0      
  5 31  1  0      
  7 10  1  0      
  7 88  1  0      
  8  9  1  0      
107  8  1  0      
  9 16  2  0      
 20  9  1  0      
 10 11  2  0      
 15 10  1  0      
 11 12  1  0      
 11 32  1  0      
 12 13  2  0      
 13 14  1  0      
 13 33  1  0      
 14 15  2  0      
 14 21  1  0      
 16 17  1  0      
 17 18  2  0      
 17 22  1  0      
 18 19  1  0      
 18 36  1  0      
 19 20  2  0      
 20 59  1  0      
 21 23  1  0      
126 21  1  0      
 22 24  1  0      
 22 25  1  0      
 23 26  2  0      
 29 23  1  0      
 24 70  2  0      
 74 24  1  0      
 28 25  1  0      
 25 29  2  0      
 26 27  1  0      
 26 34  1  0      
 27 28  2  0      
 28 35  1  0      
 30 49  1  0      
 31 58  1  0      
 32 46  1  0      
 33 42  1  0      
 34 55  1  0      
 35 52  1  0      
 36 37  1  0      
 37 38  1  0      
 38 39  1  0      
 38 67  2  0      
 39145  1  0      
 40 41  1  0      
 59 40  1  0      
 41 68  1  0      
 41 69  2  0      
 42 45  1  0      
 43 44  1  0      
 46 43  1  0      
 43 66  2  0      
 44154  1  0      
 45 64  1  0      
 45 65  2  0      
 47 48  1  0      
 58 47  1  0      
 47 61  2  0      
 48153  1  0      
 49 50  1  0      
 51 50  1  0      
 50 60  2  0      
 51150  1  0      
 52 53  1  0      
 53 54  1  0      
 53 63  2  0      
 54170  1  0      
 55 56  1  0      
 56 57  1  0      
 56 62  2  0      
 57175  1  0      
 64180  1  0      
 68163  1  0      
 70 71  1  0      
 71 72  2  0      
 72 73  1  0      
 72 75  1  0      
 73 74  2  0      
 75 87  1  0      
 76 77  1  0      
 76 86  1  0      
 77 78  1  0      
 78 79  1  0      
 79 80  1  0      
 80 81  1  0      
 81 82  1  0      
 82 83  1  0      
 83 84  1  0      
 84 85  1  0      
 86 87  1  0      
 88 89  2  0      
 93 88  1  0      
 89 90  1  0      
 90 91  2  0      
 91 92  1  0      
 91 94  1  0      
 92 93  2  0      
 94106  1  0      
 95 96  1  0      
 95105  1  0      
 96 97  1  0      
 97 98  1  0      
 98 99  1  0      
 99100  1  0      
100101  1  0      
101102  1  0      
102103  1  0      
103104  1  0      
105106  1  0      
107108  2  0      
112107  1  0      
108109  1  0      
109110  2  0      
110111  1  0      
110113  1  0      
111112  2  0      
113125  1  0      
114115  1  0      
114124  1  0      
115116  1  0      
116117  1  0      
117118  1  0      
118119  1  0      
119120  1  0      
120121  1  0      
121122  1  0      
122123  1  0      
124125  1  0      
126127  2  0      
131126  1  0      
127128  1  0      
128129  2  0      
129130  1  0      
129132  1  0      
130131  2  0      
132144  1  0      
133134  1  0      
133143  1  0      
134135  1  0      
135136  1  0      
136137  1  0      
137138  1  0      
138139  1  0      
139140  1  0      
140141  1  0      
141142  1  0      
143144  1  0      
145146  1  0      
146147  1  0      
147148  1  0      
147149  1  0      
147185  1  0      
148186  1  0      
150151  1  0      
151152  1  0      
152159  1  0      
152160  1  0      
152193  1  0      
153161  1  0      
154155  1  0      
155156  1  0      
156157  1  0      
156158  1  0      
156205  1  0      
157206  1  0      
159194  1  0      
161162  1  0      
162166  1  0      
162167  1  0      
162197  1  0      
163164  1  0      
164165  1  0      
165168  1  0      
165169  1  0      
165201  1  0      
168202  1  0      
170171  1  0      
171172  1  0      
172173  1  0      
172174  1  0      
172213  1  0      
173214  1  0      
175176  1  0      
176177  1  0      
177178  1  0      
177179  1  0      
177209  1  0      
180181  1  0      
181182  1  0      
182183  1  0      
182184  1  0      
182189  1  0      
183190  1  0      
186187  2  0      
186188  1  0      
188231  1  0      
190191  1  0      
190192  2  0      
191225  1  0      
194195  2  0      
194196  1  0      
196221  1  0      
197198  1  0      
198199  2  0      
198200  1  0      
200219  1  0      
202203  1  0      
202204  2  0      
203217  1  0      
206207  1  0      
206208  2  0      
207223  1  0      
209210  1  0      
210211  1  0      
210212  2  0      
211227  1  0      
214215  2  0      
214216  1  0      
216229  1  0      
217218  1  0      
219220  1  0      
221222  1  0      
223224  1  0      
225226  1  0      
227228  1  0      
229230  1  0      
231232  1  0      
M  CHG  8 147   1 152   1 156   1 162   1 165   1 172   1 177   1 182   1
M  END
$$$$
