# Supplementary material
Source: MDPI journal article supplement (https://www.mdpi.com/search?q=molbank-2023-M1562)
Supplement: s003 [file molbank-2023-M1562-s003.inchi]

InChI=1/C180H280N16O36/c1-29-41-45-49-53-57-61-65-69-73-109-221-141-85-77-137(78-86-141)177-145-113-147(155(227-131-163(199)183-95-103-191(17,18)123-171(207)215-35-7)117-153(145)225-129-161(197)181-93-101-189(13,14)121-169(205)213-33-5)178(138-79-87-142(88-80-138)222-110-74-70-66-62-58-54-50-46-42-30-2)149-115-151(159(231-135-167(203)187-99-107-195(25,26)127-175(211)219-39-11)119-157(149)229-133-165(201)185-97-105-193(21,22)125-173(209)217-37-9)180(140-83-91-144(92-84-140)224-112-76-72-68-64-60-56-52-48-44-32-4)152-116-150(158(230-134-166(202)186-98-106-194(23,24)126-174(210)218-38-10)120-160(152)232-136-168(204)188-100-108-196(27,28)128-176(212)220-40-12)179(139-81-89-143(90-82-139)223-111-75-71-67-63-59-55-51-47-43-31-3)148-114-146(177)154(226-130-162(198)182-94-102-190(15,16)122-170(206)214-34-6)118-156(148)228-132-164(200)184-96-104-192(19,20)124-172(208)216-36-8/h77-92,113-120,177-180H,29-76,93-112,121-136H2,1-28H3/p+8/t177-,178+,179-,180+
AuxInfo=1/5/N:85,142,123,104,230,232,228,218,226,220,224,222,174,213,149,185,178,179,169,201,184,189,166,167,158,205,160,193,84,141,122,103,229,231,227,217,225,219,223,221,83,140,121,102,82,139,120,101,81,138,119,100,80,137,118,99,79,136,117,98,78,135,116,97,77,134,115,96,76,133,114,95,86,143,124,105,70,74,127,131,108,112,89,93,71,73,128,130,109,111,90,92,170,145,175,163,180,153,154,150,171,146,176,164,181,161,155,151,87,144,125,106,29,16,15,3,27,19,12,6,173,148,209,168,183,197,157,159,52,37,55,40,42,58,46,49,24,126,107,88,72,129,110,91,25,17,23,9,14,4,10,2,28,18,26,20,13,5,11,1,53,38,56,41,45,47,43,50,214,186,210,202,190,198,206,194,22,21,8,7,54,39,57,68,64,48,44,51,172,147,177,165,182,162,156,152,63,67,62,69,65,61,66,60,215,187,212,204,192,199,208,195,216,188,211,203,191,200,207,196,75,132,113,94,35,36,34,59,33,31,32,30/E:(1,2,3,4)(5,6,7,8,9,10,11,12)(13,14,15,16,17,18,19,20,21,22,23,24,25,26,27,28)(29,30,31,32)(33,34,35,36,37,38,39,40)(41,42,43,44)(45,46,47,48)(49,50,51,52)(53,54,55,56)(57,58,59,60)(61,62,63,64)(65,66,67,68)(69,70,71,72)(73,74,75,76)(77,78,79,80,81,82,83,84)(85,86,87,88,89,90,91,92)(93,94,95,96,97,98,99,100)(101,102,103,104,105,106,107,108)(109,110,111,112)(113,114,115,116)(117,118,119,120)(121,122,123,124,125,126,127,128)(129,130,131,132,133,134,135,136)(137,138,139,140)(141,142,143,144)(145,146,147,148,149,150,151,152)(153,154,155,156,157,158,159,160)(161,162,163,164,165,166,167,168)(169,170,171,172,173,174,175,176)(177,178,179,180)(181,182,183,184,185,186,187,188)(189,190,191,192,193,194,195,196)(197,198,199,200,201,202,203,204)(205,206,207,208,209,210,211,212)(213,214,215,216,217,218,219,220)(221,222,223,224)(225,226,227,228,229,230,231,232)/CRV:189+1,190+1,191+1,192+1,193+1,194+1,195+1,196+1,197-1,198-1,199-1,200-1,201-1,202-1,203-1,204-1/rA:232CCCCCCCCCCCCCCCCCCCCCCCCCCCCCOOOOOOOCCNCCCCNCCCNCCNCCNCCNCOOOOONOOONOCCCCCOCCCCCCCCCCCCCCCCCCOCCCCCCCCCCCCCCCCCCOCCCCCCCCCCCCCCCCCCOCCCCCCCCCCCCCCN+CCCCN+CCCN+CCCCCN+CCN+CCCCCCN+CCCCN+CCCCN+CCCCOOCCOOCCOOCCOOCCOOCCOOCCOOCCOOCCCCCCCCCCCCCCCC/rB:d1;s2;d3;s4;s1d5;s2;s4;s8;s7;d10;s11;d12;s13;s10d14;d9;s16;d17;s18;s9d19;s14;s17;s21;s22;s22;d23;s26;s25d27;s23d25;s1;s5;s11;s13;s26;s28;s18;s36;s37;s38;;s40;s33;;s43;s42;s32s43;;s47;s30;s49;s50;s35;s52;s53;s34;s55;s56;s31s47;s20s40;d50;d47;d56;d53;s45;d45;d43;d38;s41;d41;d24;s70;d71;s72;s24d73;s72;;s76;s77;s78;s79;s80;s81;s82;s83;s84;s76;s75s86;s7;d88;s89;d90;s91;s88d92;s91;;s95;s96;s97;s98;s99;s100;s101;s102;s103;s95;s94s105;s8;d107;s108;d109;s110;s107d111;s110;;s114;s115;s116;s117;s118;s119;s120;s121;s122;s114;s113s124;s21;d126;s127;d128;s129;s126d130;s129;;s133;s134;s135;s136;s137;s138;s139;s140;s141;s133;s132s143;s39;s145;s146;s147;s147;s51;s150;s151;s48;s44;s154;s155;s156;s156;s152;s152;s153;s161;s68;s163;s164;s162;s162;s165;s165;s54;s170;s171;s172;s172;s57;s175;s176;s177;s177;s64;s180;s181;s182;s182;s147;s148;d186;s186;s182;s183;s190;d190;s152;s159;d194;s194;s162;s197;d198;s198;s165;s168;s202;d202;s156;s157;s206;d206;s177;s209;s210;d210;s172;s173;d214;s214;s203;s217;s200;s219;s196;s221;s207;s223;s191;s225;s211;s227;s216;s229;s188;s231;/rC:-13.6656,.8696,7.4564;-13.3147,1.1944,8.7832;-14.3562,1.2843,9.7172;-15.7033,1.0195,9.4319;-16.0677,.8057,8.0908;-15.0321,.8301,7.1502;-11.8565,1.3946,9.1925;-16.7362,.9691,10.5516;-17.266,2.349,10.9035;-11.4097,2.8397,9.4015;-10.5605,3.493,8.4842;-10.236,4.8325,8.7479;-10.5261,5.5157,9.9372;-11.2472,4.7941,10.9073;-11.7387,3.5243,10.5792;-16.573,3.1451,11.8232;-17.0658,4.3665,12.2969;-18.2745,4.8573,11.7728;-18.8913,4.1024,10.7709;-18.4906,2.8157,10.3964;-11.4477,5.3582,12.3114;-16.3779,5.0366,13.4755;-12.7824,6.0632,12.5322;-16.3127,4.027,14.6127;-15.1758,5.8941,13.1191;-12.8619,7.4702,12.561;-14.1179,8.025,12.8371;-15.288,7.299,13.0923;-13.9428,5.3176,12.7822;-12.7659,.8145,6.418;-17.3696,.7807,7.6573;-10.1684,2.942,7.2833;-10.0481,6.7676,10.2417;-11.7608,8.2524,12.3021;-16.4447,7.9721,13.4213;-18.7759,6.0948,12.0686;-19.7277,6.1542,13.1131;-20.8051,7.1775,12.7701;-21.8544,6.6456,12.0648;-20.5046,1.702,10.0275;-21.6283,2.5831,9.5044;-9.0248,7.3578,9.458;-8.3285,1.9881,5.9432;-6.9762,2.1525,5.7755;-9.5499,8.1047,8.236;-8.8444,2.4324,7.311;-19.171,-.3903,6.5438;-19.1304,-1.1388,5.3936;-12.3913,-.5066,6.0641;-12.2457,-.6615,4.5535;-10.9926,-.3847,4.0742;-17.01,8.7603,12.3881;-17.1929,10.2177,12.7821;-18.3676,10.5121,13.4338;-11.9378,9.4064,11.4962;-11.8961,10.7305,12.2573;-11.1377,11.703,11.6545;-17.9207,-.4999,7.4169;-19.2456,2.0934,9.51;-13.1649,-1.0159,3.8559;-20.1228,.3014,6.8241;-12.5064,10.9339,13.2799;-16.3928,11.0719,12.4798;-8.6391,8.7732,7.4592;-10.7194,8.1588,7.9412;-9.0251,1.5111,5.0789;-20.7256,8.3434,13.0827;-21.9462,2.3484,8.1934;-22.1992,3.41,10.1775;-15.1661,3.6635,15.3273;-15.2119,2.7184,16.3594;-16.4112,2.1061,16.7519;-17.5539,2.4876,16.0405;-17.5099,3.4141,15.0031;-16.577,1.1968,17.7607;-15.0195,-.7717,20.541;-15.7098,-1.4947,21.7101;-14.7459,-2.3157,22.5797;-15.494,-2.9738,23.7511;-14.5798,-3.8424,24.6284;-15.3542,-4.4632,25.8027;-14.4611,-5.3526,26.6816;-15.2421,-5.9653,27.8553;-14.3577,-6.8733,28.7237;-15.1438,-7.4919,29.8871;-16.0667,-.0551,19.6763;-15.4849,.7806,18.5351;-11.2953,.4138,10.2247;-10.2534,-.464,9.8864;-9.6928,-1.3622,10.7994;-10.1407,-1.4533,12.1242;-11.1744,-.5708,12.4618;-11.731,.3309,11.5528;-9.6544,-2.3042,13.0854;-7.1212,-5.0119,13.7542;-6.8506,-5.8828,14.9938;-5.6951,-6.8779,14.7878;-5.4666,-7.7463,16.0373;-4.3074,-8.7435,15.8698;-4.114,-9.6039,17.1306;-2.9491,-10.5986,16.9946;-2.7779,-11.4553,18.2607;-1.6082,-12.4453,18.1402;-1.4496,-13.2983,19.4064;-8.2748,-4.0221,13.9954;-8.598,-3.1724,12.7634;-16.3214,.1711,11.7844;-17.0479,.2549,12.9801;-16.6988,-.4821,14.1158;-15.5851,-1.3334,14.135;-14.9391,-1.4971,12.9021;-15.3028,-.7884,11.7563;-15.1812,-2.1006,15.1987;-16.3535,-3.896,18.2935;-15.5931,-4.79,19.288;-16.4869,-5.3511,20.4068;-15.6822,-6.2375,21.3726;-16.5376,-6.807,22.5162;-15.7062,-7.7022,23.4505;-16.5362,-8.2744,24.611;-15.6905,-9.1737,25.528;-16.5053,-9.7373,26.7027;-15.6505,-10.6259,27.6165;-15.4172,-3.3645,17.195;-16.1039,-2.4146,16.2103;-11.0416,4.403,13.428;-11.4309,4.623,14.7548;-10.9602,3.8326,15.8075;-10.0655,2.772,15.6025;-9.6371,2.5978,14.2797;-10.0981,3.3881,13.2256;-9.4948,2.0064,16.5895;-8.5822,2.0365,20.2458;-7.6218,1.1686,21.0781;-7.6139,1.5488,22.569;-6.6649,.6508,23.382;-6.6844,.9765,24.8853;-5.7609,.0405,25.6837;-5.796,.3275,27.1942;-4.8912,-.6374,27.9789;-4.9267,-.3712,29.4922;-4.0285,-1.349,30.2624;-8.6088,1.6043,18.769;-9.5351,2.4736,17.9143;-23.0181,7.4184,11.598;-23.6235,8.3893,12.6347;-25.0308,8.8932,12.2951;-25.4091,10.0536,13.2166;-26.0595,7.7822,12.4248;-10.5894,-.4667,2.6557;-11.4795,-1.2984,1.7042;-10.9318,-1.4987,.2833;-20.23,-1.1137,4.4154;-6.2657,1.7263,4.5581;-6.5739,2.6383,3.3544;-5.8901,2.2424,2.0357;-6.4568,3.1907,.9741;-4.3852,2.4002,2.1434;-12.0108,-2.2367,-.5121;-9.6621,-2.3341,.3069;-20.0447,-2.1685,3.3064;-21.2222,-2.3318,2.3336;-23.049,3.053,7.5224;-23.5516,2.2667,6.2956;-24.884,2.7836,5.732;-20.8759,-3.4958,1.4081;-22.5009,-2.7059,3.0653;-26.0236,2.4549,6.6932;-24.7856,4.2756,5.4594;-18.7043,11.9177,13.7254;-19.9572,12.1371,14.5973;-20.3962,13.6135,14.6764;-21.5943,13.6932,15.6252;-19.2732,14.4882,15.2058;-10.994,13.0675,12.194;-11.3901,14.0909,11.112;-11.2626,15.5689,11.5125;-12.1655,15.8862,12.6913;-9.8255,15.9011,11.8715;-7.1736,8.771,7.61;-6.6321,10.1905,7.3274;-5.1203,10.2886,7.0638;-4.8057,11.78,6.9371;-4.773,9.5799,5.7635;-25.0693,9.4274,10.8695;-25.3727,9.683,14.6921;-26.3077,9.2315,15.3147;-24.1459,9.9436,15.2167;-4.3489,9.6499,8.2046;-3.3824,12.0676,6.4805;-2.5375,12.0655,7.5401;-3.0629,12.286,5.3336;-10.6153,-.1514,-.3472;-11.7158,-2.3144,-2.0055;-11.0886,-3.1978,-2.5437;-12.2736,-1.2528,-2.6468;-21.4403,-1.1122,1.4345;-21.8076,.1813,2.1576;-22.7584,.3583,2.8841;-20.9044,1.1538,1.8491;-25.1202,2.0761,4.405;-27.3953,2.8172,6.1382;-27.6918,4.1109,6.4256;-28.1118,2.0541,5.5301;-6.2277,.805,1.673;-6.1746,2.7569,-.4589;-4.9899,3.2612,-.8843;-6.94,2.0922,-1.1215;-11.7152,16.3687,10.2879;-11.5785,17.8769,10.4501;-10.3744,18.2919,9.9772;-12.4429,18.6035,10.8864;-20.8002,14.1093,13.2943;-22.2844,15.0556,15.612;-21.949,16.01,16.2769;-23.3205,15.0451,14.7301;-28.8973,4.6357,5.9409;-28.7501,5.0433,4.4773;-21.12,2.4252,2.4023;-19.997,3.3547,1.9532;-12.1032,-1.1648,-4.0339;-12.7144,.1481,-4.5153;-4.6361,3.0761,-2.2276;-5.412,4.03,-3.1323;-1.1874,12.3409,7.2914;-.4012,12.1033,8.5765;-10.1241,19.6697,9.9619;-8.7247,19.9035,9.4011;-24.0271,16.2346,14.5072;-23.3129,17.0917,13.4646;-23.9489,9.6326,16.5682;-22.5011,9.9429,16.9354;
