# Supplementary material
Source: MDPI journal article supplement (https://www.mdpi.com/search?q=molbank-2023-M1562)
Supplement: s003 [file molbank-2023-M1562-s003.mol]

  Chem3D  11222213553D

232240  0  0  0  0  0  0  0  0999 V2000
  -13.6656    0.8696    7.4564 C   0  0  0  0  0  0  0  0  0  0  0  0
  -13.3147    1.1944    8.7832 C   0  0  0  0  0  0  0  0  0  0  0  0
  -14.3562    1.2843    9.7172 C   0  0  0  0  0  0  0  0  0  0  0  0
  -15.7033    1.0195    9.4319 C   0  0  0  0  0  0  0  0  0  0  0  0
  -16.0677    0.8057    8.0908 C   0  0  0  0  0  0  0  0  0  0  0  0
  -15.0321    0.8301    7.1502 C   0  0  0  0  0  0  0  0  0  0  0  0
  -11.8565    1.3946    9.1925 C   0  0  1  0  0  0  0  0  0  0  0  0
  -16.7362    0.9691   10.5516 C   0  0  2  0  0  0  0  0  0  0  0  0
  -17.2660    2.3490   10.9035 C   0  0  0  0  0  0  0  0  0  0  0  0
  -11.4097    2.8397    9.4015 C   0  0  0  0  0  0  0  0  0  0  0  0
  -10.5605    3.4930    8.4842 C   0  0  0  0  0  0  0  0  0  0  0  0
  -10.2360    4.8325    8.7479 C   0  0  0  0  0  0  0  0  0  0  0  0
  -10.5261    5.5157    9.9372 C   0  0  0  0  0  0  0  0  0  0  0  0
  -11.2472    4.7941   10.9073 C   0  0  0  0  0  0  0  0  0  0  0  0
  -11.7387    3.5243   10.5792 C   0  0  0  0  0  0  0  0  0  0  0  0
  -16.5730    3.1451   11.8232 C   0  0  0  0  0  0  0  0  0  0  0  0
  -17.0658    4.3665   12.2969 C   0  0  0  0  0  0  0  0  0  0  0  0
  -18.2745    4.8573   11.7728 C   0  0  0  0  0  0  0  0  0  0  0  0
  -18.8913    4.1024   10.7709 C   0  0  0  0  0  0  0  0  0  0  0  0
  -18.4906    2.8157   10.3964 C   0  0  0  0  0  0  0  0  0  0  0  0
  -11.4477    5.3582   12.3114 C   0  0  1  0  0  0  0  0  0  0  0  0
  -16.3779    5.0366   13.4755 C   0  0  1  0  0  0  0  0  0  0  0  0
  -12.7824    6.0632   12.5322 C   0  0  0  0  0  0  0  0  0  0  0  0
  -16.3127    4.0270   14.6127 C   0  0  0  0  0  0  0  0  0  0  0  0
  -15.1758    5.8941   13.1191 C   0  0  0  0  0  0  0  0  0  0  0  0
  -12.8619    7.4702   12.5610 C   0  0  0  0  0  0  0  0  0  0  0  0
  -14.1179    8.0250   12.8371 C   0  0  0  0  0  0  0  0  0  0  0  0
  -15.2880    7.2990   13.0923 C   0  0  0  0  0  0  0  0  0  0  0  0
  -13.9428    5.3176   12.7822 C   0  0  0  0  0  0  0  0  0  0  0  0
  -12.7659    0.8145    6.4180 O   0  0  0  0  0  0  0  0  0  0  0  0
  -17.3696    0.7807    7.6573 O   0  0  0  0  0  0  0  0  0  0  0  0
  -10.1684    2.9420    7.2833 O   0  0  0  0  0  0  0  0  0  0  0  0
  -10.0481    6.7676   10.2417 O   0  0  0  0  0  0  0  0  0  0  0  0
  -11.7608    8.2524   12.3021 O   0  0  0  0  0  0  0  0  0  0  0  0
  -16.4447    7.9721   13.4213 O   0  0  0  0  0  0  0  0  0  0  0  0
  -18.7759    6.0948   12.0686 O   0  0  0  0  0  0  0  0  0  0  0  0
  -19.7277    6.1542   13.1131 C   0  0  0  0  0  0  0  0  0  0  0  0
  -20.8051    7.1775   12.7701 C   0  0  0  0  0  0  0  0  0  0  0  0
  -21.8544    6.6456   12.0648 N   0  0  0  0  0  0  0  0  0  0  0  0
  -20.5046    1.7020   10.0275 C   0  0  0  0  0  0  0  0  0  0  0  0
  -21.6283    2.5831    9.5044 C   0  0  0  0  0  0  0  0  0  0  0  0
   -9.0248    7.3578    9.4580 C   0  0  0  0  0  0  0  0  0  0  0  0
   -8.3285    1.9881    5.9432 C   0  0  0  0  0  0  0  0  0  0  0  0
   -6.9762    2.1525    5.7755 N   0  0  0  0  0  0  0  0  0  0  0  0
   -9.5499    8.1047    8.2360 C   0  0  0  0  0  0  0  0  0  0  0  0
   -8.8444    2.4324    7.3110 C   0  0  0  0  0  0  0  0  0  0  0  0
  -19.1710   -0.3903    6.5438 C   0  0  0  0  0  0  0  0  0  0  0  0
  -19.1304   -1.1388    5.3936 N   0  0  0  0  0  0  0  0  0  0  0  0
  -12.3913   -0.5066    6.0641 C   0  0  0  0  0  0  0  0  0  0  0  0
  -12.2457   -0.6615    4.5535 C   0  0  0  0  0  0  0  0  0  0  0  0
  -10.9926   -0.3847    4.0742 N   0  0  0  0  0  0  0  0  0  0  0  0
  -17.0100    8.7603   12.3881 C   0  0  0  0  0  0  0  0  0  0  0  0
  -17.1929   10.2177   12.7821 C   0  0  0  0  0  0  0  0  0  0  0  0
  -18.3676   10.5121   13.4338 N   0  0  0  0  0  0  0  0  0  0  0  0
  -11.9378    9.4064   11.4962 C   0  0  0  0  0  0  0  0  0  0  0  0
  -11.8961   10.7305   12.2573 C   0  0  0  0  0  0  0  0  0  0  0  0
  -11.1377   11.7030   11.6545 N   0  0  0  0  0  0  0  0  0  0  0  0
  -17.9207   -0.4999    7.4169 C   0  0  0  0  0  0  0  0  0  0  0  0
  -19.2456    2.0934    9.5100 O   0  0  0  0  0  0  0  0  0  0  0  0
  -13.1649   -1.0159    3.8559 O   0  0  0  0  0  0  0  0  0  0  0  0
  -20.1228    0.3014    6.8241 O   0  0  0  0  0  0  0  0  0  0  0  0
  -12.5064   10.9339   13.2799 O   0  0  0  0  0  0  0  0  0  0  0  0
  -16.3928   11.0719   12.4798 O   0  0  0  0  0  0  0  0  0  0  0  0
   -8.6391    8.7732    7.4592 N   0  0  0  0  0  0  0  0  0  0  0  0
  -10.7194    8.1588    7.9412 O   0  0  0  0  0  0  0  0  0  0  0  0
   -9.0251    1.5111    5.0789 O   0  0  0  0  0  0  0  0  0  0  0  0
  -20.7256    8.3434   13.0827 O   0  0  0  0  0  0  0  0  0  0  0  0
  -21.9462    2.3484    8.1934 N   0  0  0  0  0  0  0  0  0  0  0  0
  -22.1992    3.4100   10.1775 O   0  0  0  0  0  0  0  0  0  0  0  0
  -15.1661    3.6635   15.3273 C   0  0  0  0  0  0  0  0  0  0  0  0
  -15.2119    2.7184   16.3594 C   0  0  0  0  0  0  0  0  0  0  0  0
  -16.4112    2.1061   16.7519 C   0  0  0  0  0  0  0  0  0  0  0  0
  -17.5539    2.4876   16.0405 C   0  0  0  0  0  0  0  0  0  0  0  0
  -17.5099    3.4141   15.0031 C   0  0  0  0  0  0  0  0  0  0  0  0
  -16.5770    1.1968   17.7607 O   0  0  0  0  0  0  0  0  0  0  0  0
  -15.0195   -0.7717   20.5410 C   0  0  0  0  0  0  0  0  0  0  0  0
  -15.7098   -1.4947   21.7101 C   0  0  0  0  0  0  0  0  0  0  0  0
  -14.7459   -2.3157   22.5797 C   0  0  0  0  0  0  0  0  0  0  0  0
  -15.4940   -2.9738   23.7511 C   0  0  0  0  0  0  0  0  0  0  0  0
  -14.5798   -3.8424   24.6284 C   0  0  0  0  0  0  0  0  0  0  0  0
  -15.3542   -4.4632   25.8027 C   0  0  0  0  0  0  0  0  0  0  0  0
  -14.4611   -5.3526   26.6816 C   0  0  0  0  0  0  0  0  0  0  0  0
  -15.2421   -5.9653   27.8553 C   0  0  0  0  0  0  0  0  0  0  0  0
  -14.3577   -6.8733   28.7237 C   0  0  0  0  0  0  0  0  0  0  0  0
  -15.1438   -7.4919   29.8871 C   0  0  0  0  0  0  0  0  0  0  0  0
  -16.0667   -0.0551   19.6763 C   0  0  0  0  0  0  0  0  0  0  0  0
  -15.4849    0.7806   18.5351 C   0  0  0  0  0  0  0  0  0  0  0  0
  -11.2953    0.4138   10.2247 C   0  0  0  0  0  0  0  0  0  0  0  0
  -10.2534   -0.4640    9.8864 C   0  0  0  0  0  0  0  0  0  0  0  0
   -9.6928   -1.3622   10.7994 C   0  0  0  0  0  0  0  0  0  0  0  0
  -10.1407   -1.4533   12.1242 C   0  0  0  0  0  0  0  0  0  0  0  0
  -11.1744   -0.5708   12.4618 C   0  0  0  0  0  0  0  0  0  0  0  0
  -11.7310    0.3309   11.5528 C   0  0  0  0  0  0  0  0  0  0  0  0
   -9.6544   -2.3042   13.0854 O   0  0  0  0  0  0  0  0  0  0  0  0
   -7.1212   -5.0119   13.7542 C   0  0  0  0  0  0  0  0  0  0  0  0
   -6.8506   -5.8828   14.9938 C   0  0  0  0  0  0  0  0  0  0  0  0
   -5.6951   -6.8779   14.7878 C   0  0  0  0  0  0  0  0  0  0  0  0
   -5.4666   -7.7463   16.0373 C   0  0  0  0  0  0  0  0  0  0  0  0
   -4.3074   -8.7435   15.8698 C   0  0  0  0  0  0  0  0  0  0  0  0
   -4.1140   -9.6039   17.1306 C   0  0  0  0  0  0  0  0  0  0  0  0
   -2.9491  -10.5986   16.9946 C   0  0  0  0  0  0  0  0  0  0  0  0
   -2.7779  -11.4553   18.2607 C   0  0  0  0  0  0  0  0  0  0  0  0
   -1.6082  -12.4453   18.1402 C   0  0  0  0  0  0  0  0  0  0  0  0
   -1.4496  -13.2983   19.4064 C   0  0  0  0  0  0  0  0  0  0  0  0
   -8.2748   -4.0221   13.9954 C   0  0  0  0  0  0  0  0  0  0  0  0
   -8.5980   -3.1724   12.7634 C   0  0  0  0  0  0  0  0  0  0  0  0
  -16.3214    0.1711   11.7844 C   0  0  0  0  0  0  0  0  0  0  0  0
  -17.0479    0.2549   12.9801 C   0  0  0  0  0  0  0  0  0  0  0  0
  -16.6988   -0.4821   14.1158 C   0  0  0  0  0  0  0  0  0  0  0  0
  -15.5851   -1.3334   14.1350 C   0  0  0  0  0  0  0  0  0  0  0  0
  -14.9391   -1.4971   12.9021 C   0  0  0  0  0  0  0  0  0  0  0  0
  -15.3028   -0.7884   11.7563 C   0  0  0  0  0  0  0  0  0  0  0  0
  -15.1812   -2.1006   15.1987 O   0  0  0  0  0  0  0  0  0  0  0  0
  -16.3535   -3.8960   18.2935 C   0  0  0  0  0  0  0  0  0  0  0  0
  -15.5931   -4.7900   19.2880 C   0  0  0  0  0  0  0  0  0  0  0  0
  -16.4869   -5.3511   20.4068 C   0  0  0  0  0  0  0  0  0  0  0  0
  -15.6822   -6.2375   21.3726 C   0  0  0  0  0  0  0  0  0  0  0  0
  -16.5376   -6.8070   22.5162 C   0  0  0  0  0  0  0  0  0  0  0  0
  -15.7062   -7.7022   23.4505 C   0  0  0  0  0  0  0  0  0  0  0  0
  -16.5362   -8.2744   24.6110 C   0  0  0  0  0  0  0  0  0  0  0  0
  -15.6905   -9.1737   25.5280 C   0  0  0  0  0  0  0  0  0  0  0  0
  -16.5053   -9.7373   26.7027 C   0  0  0  0  0  0  0  0  0  0  0  0
  -15.6505  -10.6259   27.6165 C   0  0  0  0  0  0  0  0  0  0  0  0
  -15.4172   -3.3645   17.1950 C   0  0  0  0  0  0  0  0  0  0  0  0
  -16.1039   -2.4146   16.2103 C   0  0  0  0  0  0  0  0  0  0  0  0
  -11.0416    4.4030   13.4280 C   0  0  0  0  0  0  0  0  0  0  0  0
  -11.4309    4.6230   14.7548 C   0  0  0  0  0  0  0  0  0  0  0  0
  -10.9602    3.8326   15.8075 C   0  0  0  0  0  0  0  0  0  0  0  0
  -10.0655    2.7720   15.6025 C   0  0  0  0  0  0  0  0  0  0  0  0
   -9.6371    2.5978   14.2797 C   0  0  0  0  0  0  0  0  0  0  0  0
  -10.0981    3.3881   13.2256 C   0  0  0  0  0  0  0  0  0  0  0  0
   -9.4948    2.0064   16.5895 O   0  0  0  0  0  0  0  0  0  0  0  0
   -8.5822    2.0365   20.2458 C   0  0  0  0  0  0  0  0  0  0  0  0
   -7.6218    1.1686   21.0781 C   0  0  0  0  0  0  0  0  0  0  0  0
   -7.6139    1.5488   22.5690 C   0  0  0  0  0  0  0  0  0  0  0  0
   -6.6649    0.6508   23.3820 C   0  0  0  0  0  0  0  0  0  0  0  0
   -6.6844    0.9765   24.8853 C   0  0  0  0  0  0  0  0  0  0  0  0
   -5.7609    0.0405   25.6837 C   0  0  0  0  0  0  0  0  0  0  0  0
   -5.7960    0.3275   27.1942 C   0  0  0  0  0  0  0  0  0  0  0  0
   -4.8912   -0.6374   27.9789 C   0  0  0  0  0  0  0  0  0  0  0  0
   -4.9267   -0.3712   29.4922 C   0  0  0  0  0  0  0  0  0  0  0  0
   -4.0285   -1.3490   30.2624 C   0  0  0  0  0  0  0  0  0  0  0  0
   -8.6088    1.6043   18.7690 C   0  0  0  0  0  0  0  0  0  0  0  0
   -9.5351    2.4736   17.9143 C   0  0  0  0  0  0  0  0  0  0  0  0
  -23.0181    7.4184   11.5980 C   0  0  0  0  0  0  0  0  0  0  0  0
  -23.6235    8.3893   12.6347 C   0  0  0  0  0  0  0  0  0  0  0  0
  -25.0308    8.8932   12.2951 N   0  3  0  0  0  0  0  0  0  0  0  0
  -25.4091   10.0536   13.2166 C   0  0  0  0  0  0  0  0  0  0  0  0
  -26.0595    7.7822   12.4248 C   0  0  0  0  0  0  0  0  0  0  0  0
  -10.5894   -0.4667    2.6557 C   0  0  0  0  0  0  0  0  0  0  0  0
  -11.4795   -1.2984    1.7042 C   0  0  0  0  0  0  0  0  0  0  0  0
  -10.9318   -1.4987    0.2833 N   0  3  0  0  0  0  0  0  0  0  0  0
  -20.2300   -1.1137    4.4154 C   0  0  0  0  0  0  0  0  0  0  0  0
   -6.2657    1.7263    4.5581 C   0  0  0  0  0  0  0  0  0  0  0  0
   -6.5739    2.6383    3.3544 C   0  0  0  0  0  0  0  0  0  0  0  0
   -5.8901    2.2424    2.0357 N   0  3  0  0  0  0  0  0  0  0  0  0
   -6.4568    3.1907    0.9741 C   0  0  0  0  0  0  0  0  0  0  0  0
   -4.3852    2.4002    2.1434 C   0  0  0  0  0  0  0  0  0  0  0  0
  -12.0108   -2.2367   -0.5121 C   0  0  0  0  0  0  0  0  0  0  0  0
   -9.6621   -2.3341    0.3069 C   0  0  0  0  0  0  0  0  0  0  0  0
  -20.0447   -2.1685    3.3064 C   0  0  0  0  0  0  0  0  0  0  0  0
  -21.2222   -2.3318    2.3336 N   0  3  0  0  0  0  0  0  0  0  0  0
  -23.0490    3.0530    7.5224 C   0  0  0  0  0  0  0  0  0  0  0  0
  -23.5516    2.2667    6.2956 C   0  0  0  0  0  0  0  0  0  0  0  0
  -24.8840    2.7836    5.7320 N   0  3  0  0  0  0  0  0  0  0  0  0
  -20.8759   -3.4958    1.4081 C   0  0  0  0  0  0  0  0  0  0  0  0
  -22.5009   -2.7059    3.0653 C   0  0  0  0  0  0  0  0  0  0  0  0
  -26.0236    2.4549    6.6932 C   0  0  0  0  0  0  0  0  0  0  0  0
  -24.7856    4.2756    5.4594 C   0  0  0  0  0  0  0  0  0  0  0  0
  -18.7043   11.9177   13.7254 C   0  0  0  0  0  0  0  0  0  0  0  0
  -19.9572   12.1371   14.5973 C   0  0  0  0  0  0  0  0  0  0  0  0
  -20.3962   13.6135   14.6764 N   0  3  0  0  0  0  0  0  0  0  0  0
  -21.5943   13.6932   15.6252 C   0  0  0  0  0  0  0  0  0  0  0  0
  -19.2732   14.4882   15.2058 C   0  0  0  0  0  0  0  0  0  0  0  0
  -10.9940   13.0675   12.1940 C   0  0  0  0  0  0  0  0  0  0  0  0
  -11.3901   14.0909   11.1120 C   0  0  0  0  0  0  0  0  0  0  0  0
  -11.2626   15.5689   11.5125 N   0  3  0  0  0  0  0  0  0  0  0  0
  -12.1655   15.8862   12.6913 C   0  0  0  0  0  0  0  0  0  0  0  0
   -9.8255   15.9011   11.8715 C   0  0  0  0  0  0  0  0  0  0  0  0
   -7.1736    8.7710    7.6100 C   0  0  0  0  0  0  0  0  0  0  0  0
   -6.6321   10.1905    7.3274 C   0  0  0  0  0  0  0  0  0  0  0  0
   -5.1203   10.2886    7.0638 N   0  3  0  0  0  0  0  0  0  0  0  0
   -4.8057   11.7800    6.9371 C   0  0  0  0  0  0  0  0  0  0  0  0
   -4.7730    9.5799    5.7635 C   0  0  0  0  0  0  0  0  0  0  0  0
  -25.0693    9.4274   10.8695 C   0  0  0  0  0  0  0  0  0  0  0  0
  -25.3727    9.6830   14.6921 C   0  0  0  0  0  0  0  0  0  0  0  0
  -26.3077    9.2315   15.3147 O   0  0  0  0  0  0  0  0  0  0  0  0
  -24.1459    9.9436   15.2167 O   0  0  0  0  0  0  0  0  0  0  0  0
   -4.3489    9.6499    8.2046 C   0  0  0  0  0  0  0  0  0  0  0  0
   -3.3824   12.0676    6.4805 C   0  0  0  0  0  0  0  0  0  0  0  0
   -2.5375   12.0655    7.5401 O   0  0  0  0  0  0  0  0  0  0  0  0
   -3.0629   12.2860    5.3336 O   0  0  0  0  0  0  0  0  0  0  0  0
  -10.6153   -0.1514   -0.3472 C   0  0  0  0  0  0  0  0  0  0  0  0
  -11.7158   -2.3144   -2.0055 C   0  0  0  0  0  0  0  0  0  0  0  0
  -11.0886   -3.1978   -2.5437 O   0  0  0  0  0  0  0  0  0  0  0  0
  -12.2736   -1.2528   -2.6468 O   0  0  0  0  0  0  0  0  0  0  0  0
  -21.4403   -1.1122    1.4345 C   0  0  0  0  0  0  0  0  0  0  0  0
  -21.8076    0.1813    2.1576 C   0  0  0  0  0  0  0  0  0  0  0  0
  -22.7584    0.3583    2.8841 O   0  0  0  0  0  0  0  0  0  0  0  0
  -20.9044    1.1538    1.8491 O   0  0  0  0  0  0  0  0  0  0  0  0
  -25.1202    2.0761    4.4050 C   0  0  0  0  0  0  0  0  0  0  0  0
  -27.3953    2.8172    6.1382 C   0  0  0  0  0  0  0  0  0  0  0  0
  -27.6918    4.1109    6.4256 O   0  0  0  0  0  0  0  0  0  0  0  0
  -28.1118    2.0541    5.5301 O   0  0  0  0  0  0  0  0  0  0  0  0
   -6.2277    0.8050    1.6730 C   0  0  0  0  0  0  0  0  0  0  0  0
   -6.1746    2.7569   -0.4589 C   0  0  0  0  0  0  0  0  0  0  0  0
   -4.9899    3.2612   -0.8843 O   0  0  0  0  0  0  0  0  0  0  0  0
   -6.9400    2.0922   -1.1215 O   0  0  0  0  0  0  0  0  0  0  0  0
  -11.7152   16.3687   10.2879 C   0  0  0  0  0  0  0  0  0  0  0  0
  -11.5785   17.8769   10.4501 C   0  0  0  0  0  0  0  0  0  0  0  0
  -10.3744   18.2919    9.9772 O   0  0  0  0  0  0  0  0  0  0  0  0
  -12.4429   18.6035   10.8864 O   0  0  0  0  0  0  0  0  0  0  0  0
  -20.8002   14.1093   13.2943 C   0  0  0  0  0  0  0  0  0  0  0  0
  -22.2844   15.0556   15.6120 C   0  0  0  0  0  0  0  0  0  0  0  0
  -21.9490   16.0100   16.2769 O   0  0  0  0  0  0  0  0  0  0  0  0
  -23.3205   15.0451   14.7301 O   0  0  0  0  0  0  0  0  0  0  0  0
  -28.8973    4.6357    5.9409 C   0  0  0  0  0  0  0  0  0  0  0  0
  -28.7501    5.0433    4.4773 C   0  0  0  0  0  0  0  0  0  0  0  0
  -21.1200    2.4252    2.4023 C   0  0  0  0  0  0  0  0  0  0  0  0
  -19.9970    3.3547    1.9532 C   0  0  0  0  0  0  0  0  0  0  0  0
  -12.1032   -1.1648   -4.0339 C   0  0  0  0  0  0  0  0  0  0  0  0
  -12.7144    0.1481   -4.5153 C   0  0  0  0  0  0  0  0  0  0  0  0
   -4.6361    3.0761   -2.2276 C   0  0  0  0  0  0  0  0  0  0  0  0
   -5.4120    4.0300   -3.1323 C   0  0  0  0  0  0  0  0  0  0  0  0
   -1.1874   12.3409    7.2914 C   0  0  0  0  0  0  0  0  0  0  0  0
   -0.4012   12.1033    8.5765 C   0  0  0  0  0  0  0  0  0  0  0  0
  -10.1241   19.6697    9.9619 C   0  0  0  0  0  0  0  0  0  0  0  0
   -8.7247   19.9035    9.4011 C   0  0  0  0  0  0  0  0  0  0  0  0
  -24.0271   16.2346   14.5072 C   0  0  0  0  0  0  0  0  0  0  0  0
  -23.3129   17.0917   13.4646 C   0  0  0  0  0  0  0  0  0  0  0  0
  -23.9489    9.6326   16.5682 C   0  0  0  0  0  0  0  0  0  0  0  0
  -22.5011    9.9429   16.9354 C   0  0  0  0  0  0  0  0  0  0  0  0
  1  2  2  0      
  6  1  1  0      
  1 30  1  0      
  2  3  1  0      
  2  7  1  0      
  3  4  2  0      
  4  5  1  0      
  4  8  1  0      
  5  6  2  0      
  5 31  1  0      
  7 10  1  0      
  7 88  1  0      
  8  9  1  0      
107  8  1  0      
  9 16  2  0      
 20  9  1  0      
 10 11  2  0      
 15 10  1  0      
 11 12  1  0      
 11 32  1  0      
 12 13  2  0      
 13 14  1  0      
 13 33  1  0      
 14 15  2  0      
 14 21  1  0      
 16 17  1  0      
 17 18  2  0      
 17 22  1  0      
 18 19  1  0      
 18 36  1  0      
 19 20  2  0      
 20 59  1  0      
 21 23  1  0      
126 21  1  0      
 22 24  1  0      
 22 25  1  0      
 23 26  2  0      
 29 23  1  0      
 24 70  2  0      
 74 24  1  0      
 28 25  1  0      
 25 29  2  0      
 26 27  1  0      
 26 34  1  0      
 27 28  2  0      
 28 35  1  0      
 30 49  1  0      
 31 58  1  0      
 32 46  1  0      
 33 42  1  0      
 34 55  1  0      
 35 52  1  0      
 36 37  1  0      
 37 38  1  0      
 38 39  1  0      
 38 67  2  0      
 39145  1  0      
 40 41  1  0      
 59 40  1  0      
 41 68  1  0      
 41 69  2  0      
 42 45  1  0      
 43 44  1  0      
 46 43  1  0      
 43 66  2  0      
 44154  1  0      
 45 64  1  0      
 45 65  2  0      
 47 48  1  0      
 58 47  1  0      
 47 61  2  0      
 48153  1  0      
 49 50  1  0      
 51 50  1  0      
 50 60  2  0      
 51150  1  0      
 52 53  1  0      
 53 54  1  0      
 53 63  2  0      
 54170  1  0      
 55 56  1  0      
 56 57  1  0      
 56 62  2  0      
 57175  1  0      
 64180  1  0      
 68163  1  0      
 70 71  1  0      
 71 72  2  0      
 72 73  1  0      
 72 75  1  0      
 73 74  2  0      
 75 87  1  0      
 76 77  1  0      
 76 86  1  0      
 77 78  1  0      
 78 79  1  0      
 79 80  1  0      
 80 81  1  0      
 81 82  1  0      
 82 83  1  0      
 83 84  1  0      
 84 85  1  0      
 86 87  1  0      
 88 89  2  0      
 93 88  1  0      
 89 90  1  0      
 90 91  2  0      
 91 92  1  0      
 91 94  1  0      
 92 93  2  0      
 94106  1  0      
 95 96  1  0      
 95105  1  0      
 96 97  1  0      
 97 98  1  0      
 98 99  1  0      
 99100  1  0      
100101  1  0      
101102  1  0      
102103  1  0      
103104  1  0      
105106  1  0      
107108  2  0      
112107  1  0      
108109  1  0      
109110  2  0      
110111  1  0      
110113  1  0      
111112  2  0      
113125  1  0      
114115  1  0      
114124  1  0      
115116  1  0      
116117  1  0      
117118  1  0      
118119  1  0      
119120  1  0      
120121  1  0      
121122  1  0      
122123  1  0      
124125  1  0      
126127  2  0      
131126  1  0      
127128  1  0      
128129  2  0      
129130  1  0      
129132  1  0      
130131  2  0      
132144  1  0      
133134  1  0      
133143  1  0      
134135  1  0      
135136  1  0      
136137  1  0      
137138  1  0      
138139  1  0      
139140  1  0      
140141  1  0      
141142  1  0      
143144  1  0      
145146  1  0      
146147  1  0      
147148  1  0      
147149  1  0      
147185  1  0      
148186  1  0      
150151  1  0      
151152  1  0      
152159  1  0      
152160  1  0      
152193  1  0      
153161  1  0      
154155  1  0      
155156  1  0      
156157  1  0      
156158  1  0      
156205  1  0      
157206  1  0      
159194  1  0      
161162  1  0      
162166  1  0      
162167  1  0      
162197  1  0      
163164  1  0      
164165  1  0      
165168  1  0      
165169  1  0      
165201  1  0      
168202  1  0      
170171  1  0      
171172  1  0      
172173  1  0      
172174  1  0      
172213  1  0      
173214  1  0      
175176  1  0      
176177  1  0      
177178  1  0      
177179  1  0      
177209  1  0      
180181  1  0      
181182  1  0      
182183  1  0      
182184  1  0      
182189  1  0      
183190  1  0      
186187  2  0      
186188  1  0      
188231  1  0      
190191  1  0      
190192  2  0      
191225  1  0      
194195  2  0      
194196  1  0      
196221  1  0      
197198  1  0      
198199  2  0      
198200  1  0      
200219  1  0      
202203  1  0      
202204  2  0      
203217  1  0      
206207  1  0      
206208  2  0      
207223  1  0      
209210  1  0      
210211  1  0      
210212  2  0      
211227  1  0      
214215  2  0      
214216  1  0      
216229  1  0      
217218  1  0      
219220  1  0      
221222  1  0      
223224  1  0      
225226  1  0      
227228  1  0      
229230  1  0      
231232  1  0      
M  CHG  8 147   1 152   1 156   1 162   1 165   1 172   1 177   1 182   1
M  END
